1 **TITLE**

2 **Mitotic chromosome condensation requires phosphorylation of the**  
3 **centromeric protein KNL-2 in *C. elegans***

4

5 **RUNNING TITLE**

6 KNL-2 regulates chromosome condensation

7

8 **AUTHORS**

9 **Names:** Joanna M. Wenda, Reinier F. Prosée, Caroline Gabus, Florian A. Steiner

10 **Affiliations:** Department of Molecular Biology and Institute for Genetics and Genomics in Geneva,  
11 Section of Biology, Faculty of Sciences, University of Geneva, 1211 Geneva, Switzerland

12 **Corresponding author:** florian.steiner@unige.ch

13

14 **KEYWORDS:** KNL-2, chromosome condensation, *C. elegans*, condensin II, centromere

15

16 **SUMMARY STATEMENT**

17 *Phosphorylation of the essential centromere protein KNL-2 is required for mitotic chromosome*  
18 *condensation, but not for the role of KNL-2 in centromere maintenance and kinetochore formation.*

## 19 **ABSTRACT**

20 Centromeres are chromosomal regions that serve as sites for kinetochore formation and microtubule  
21 attachment, processes that are essential for chromosome segregation during mitosis. Centromeres  
22 are almost universally defined by the histone variant CENP-A. In the holocentric nematode *C.*  
23 *elegans*, CENP-A deposition depends on the loading factor KNL-2. Depletion of either CENP-A or KNL-  
24 2 results in defects in centromere maintenance, chromosome condensation and kinetochore  
25 formation, leading to chromosome segregation failure. Here, we show that KNL-2 is phosphorylated  
26 by CDK-1, and that mutation of three C-terminal phosphorylation sites causes chromosome  
27 segregation defects and an increase in embryonic lethality. In strains expressing phosphodeficient  
28 KNL-2, CENP-A and kinetochore proteins are properly localised, indicating that the role of KNL-2 in  
29 centromere maintenance is not affected. Instead, the mutant embryos exhibit reduced mitotic levels  
30 of condensin II on chromosomes and significant chromosome condensation impairment. Our findings  
31 separate the functions of KNL-2 in CENP-A loading and chromosome condensation and demonstrate  
32 that KNL-2 phosphorylation regulates the cooperation between centromeric regions and the  
33 condensation machinery in *C. elegans*.

## 34 **INTRODUCTION**

35 At the onset of mitosis, the loose interphase chromatin condenses into compact, rod-shaped  
36 chromosomes that are subsequently pulled apart by the mitotic spindle to the forming daughter  
37 cells. The points of contact between the spindle and chromosomes are special regions of chromatin,  
38 called centromeres, that are exposed on the surface of mitotic chromosomes and positioned to face  
39 opposite sides. Centromeres have a specific structural organisation enabling them to withstand  
40 forces exerted by the spindle. They recruit kinetochore complexes, multiprotein structures that  
41 mechanically anchor the spindle microtubules onto the chromatin (McKinley and Cheeseman, 2016).  
42 The specific functions of centromeres require properties and adaptations that are different from  
43 non-centromeric chromatin (Bloom and Joglekar, 2010).

44 Despite sharing a common principle of action, centromeres vary in organisation between different  
45 species. In monocentric species, centromeres occupy a restricted region of the chromosome with  
46 sizes ranging from 125 base pairs in budding yeast to millions of base pairs in vertebrates (McKinley  
47 and Cheeseman, 2016). In holocentric species, centromeres cover the whole axis of the chromosome  
48 (Steiner and Henikoff, 2015). The defining feature for centromeres in most eukaryotes is the  
49 presence of CENP-A, a centromeric variant of histone H3 (McKinley and Cheeseman, 2016).

50 Although the maintenance of centromeric chromatin mechanistically differs between species, it  
51 generally revolves around the timely deposition of CENP-A. Licensing factors, such as the MIS18

52 complex (Fujita et al., 2007; Hayashi et al., 2004) identify the sites for CENP-A deposition and recruit  
53 CENP-A specific chaperones, HJURP or Scm3 (Bernad et al., 2011; Dunleavy et al., 2009; Foltz et al.,  
54 2009), which then complete the process of loading of new CENP-A nucleosomes. CENP-A loading is  
55 often restricted to a particular phase of the cell cycle, e.g. G1 in human cells (Jansen et al., 2007) or  
56 G2 in *Schizosaccharomyces pombe* (Dunleavy et al., 2007). The spatiotemporal regulation of CENP-A  
57 deposition is heavily dependent on phosphorylation events carried out by mitotic kinases. In human  
58 cells, the CENP-A licensing machinery is inhibited by CDK1-mediated phosphorylation of the MIS18  
59 licensing complex and HJURP (McKinley and Cheeseman, 2014; Pan et al., 2017; Silva et al., 2012;  
60 Spiller et al., 2017; Stankovic et al., 2017). PLK1 phosphorylates the MIS18 complex to promote  
61 CENP-A deposition (McKinley and Cheeseman, 2014). The recruitment of inner and outer kinetochore  
62 proteins is also regulated by phosphorylation events (Navarro and Cheeseman, 2021).

63 The spatial organisation of centromeres within mitotic chromosomes is important for their specific  
64 mechanistic properties. Centromeres are typically denser than the rest of the chromosome and more  
65 resistant to the tension created by the mitotic spindle pulling forces (Bloom and Joglekar, 2010;  
66 Harasymiw et al., 2019). Centromere elasticity and tension-sensing mechanisms are thought to play  
67 an important role in achieving bi-orientation and faithful chromosome segregation (Foley and  
68 Kapoor, 2013). Furthermore, condensin complexes involved in the formation of the mitotic  
69 chromosomes (Gibcus et al., 2018; Hirano and Mitchison, 1994; Ono et al., 2003) are enriched at  
70 centromeric regions (Csankovszki et al., 2009; Hagstrom et al., 2002; Ono et al., 2004; Savvidou et al.,  
71 2005; Shintomi and Hirano, 2011) and influence centromeric chromatin organisation (Bernad et al.,  
72 2011; Oliveira et al., 2005; Samoshkin et al., 2009; Yong-Gonzalez et al., 2007).

73 Holocentric chromosomes provide an especially interesting model for studying centromere  
74 establishment and the properties of centromeric regions. Centromeric chromatin is not restricted to  
75 a specific region, but scattered discontinuously across the genome, which may require special  
76 adaptations for its maintenance machinery. Furthermore, on the condensed chromosomes, these  
77 scattered regions are all placed on the surface and collectively span the whole chromosome axis  
78 (Steiner and Henikoff, 2015). This centromere organisation might have unique consequences for  
79 chromosome condensation and their physical properties.

80 In the holocentric nematode *Caenorhabditis elegans* the functional CENP-A homologue is called HCP-  
81 3 (thereafter referred to as CENP-A for clarity) (Buchwitz et al., 1999; Monen et al., 2005). CENP-A  
82 deposition is regulated by KNL-2, a M18BP1 homologue, which acts as a loading factor in *C. elegans*  
83 (Maddox et al., 2007), and LIN-53, a RbAp46/48 homologue (Lee et al., 2016). KNL-2 and CENP-A  
84 interact directly through CENP-A N-terminal tail and are dependent on one another for chromatin

85 binding (de Groot et al., 2021; Maddox et al., 2007; Prosée et al., 2020). They exhibit a similar  
86 localisation pattern throughout the cell cycle and have overlapping genomic distributions (Gassmann  
87 et al., 2012; Maddox et al., 2007). On prometaphase chromosomes they localise to form a  
88 characteristic pattern of two parallel lines ('railroad track') spanning the entire chromosome length.  
89 CENP-A and KNL-2 are required for kinetochore recruitment (Maddox et al., 2007; Oegema et al.,  
90 2001). Depletion of either KNL-2 or CENP-A is detrimental for cell viability and results in severe cell  
91 division impairment: chromosomes do not condense properly and the kinetochores fail to assemble  
92 leading to lack of microtubule attachment and a failure in chromosome segregation (Hagstrom et al.,  
93 2002; Maddox et al., 2007, 2006; Oegema et al., 2001).

94 However, it remains unclear if all the mitotic defects observed after KNL-2 depletion are a  
95 consequence of the failure to load CENP-A and form centromeres. Chromosome condensation and  
96 segregation are dynamic processes that are mechanistically linked, and secondary defects in  
97 depletion experiments could obscure important roles of KNL-2 in either of these processes. To  
98 investigate the roles of KNL-2 in more detail, we therefore examined KNL-2 post-translational  
99 modifications that could be involved in its spatiotemporal regulation.

100 Here we show that the function of KNL-2 in mitosis is regulated by phosphorylation in *C. elegans*  
101 embryos. Mutation of three CDK-1 phosphorylation sites results in cell division defects and  
102 embryonic lethality. While CENP-A loading and kinetochore recruitment are not affected in the  
103 phosphodeficient strain, chromosome condensation is significantly impaired. These observations  
104 show that the KNL-2 functions in chromosome condensation and centromere maintenance are  
105 independent and separately regulated. We propose that KNL-2 is a main player in orchestrating the  
106 cooperation between centromeric chromatin and the condensation machinery in *C. elegans*  
107 embryos.

## 108 **RESULTS**

### 109 **KNL-2 is regulated by phosphorylation**

110 Depletion of KNL-2 from *C. elegans* embryos results in severe mitotic defects, including loss of CENP-  
111 A on chromatin, inability to form the kinetochore, defects in chromosome condensation, and failure  
112 to segregate chromosomes (Maddox et al., 2007). In order to investigate how KNL-2 function in these  
113 processes is regulated, we set out to identify potential regulatory post-translational modifications.  
114 We created a strain expressing HA-tagged KNL-2 from the endogenous locus and performed  
115 immunoprecipitation from worm embryonic lysates followed by mass spectrometry. We focused our  
116 analysis on phosphorylated residues fitting the motif S/TP, the minimal consensus for cyclin-  
117 dependent kinases (CDKs) (Errico et al., 2010), since centromere licensing factors in other species are

118 regulated by CDK-1 phosphorylation (French and Straight, 2019; McKinley and Cheeseman, 2014; Pan  
119 et al., 2017; Silva et al., 2012; Spiller et al., 2017; Stankovic et al., 2017). We identified two such sites  
120 near the C-terminus of KNL-2 (Fig. 1A, Fig. S1A), S772 and S784. Another candidate CDK target TP site  
121 (T750) is present in close proximity. We did not find evidence for its phosphorylation in our mass  
122 spectrometry data, possibly because the peptide generated after trypsin digestion would be very  
123 short (Table S1). All three sites are conserved within the *Caenorhabditis* genus (Fig. S1B), and we  
124 hypothesised that all three could serve as targets for phosphorylation for the cyclin-dependent  
125 kinase CDK-1.

126 We tested whether T750, S772 and S784 can be phosphorylated by CDK-1 *in vitro*. We purified  
127 recombinant C-terminal KNL-2 fragments expressed in *Escherichia coli*, with or without substitutions  
128 of these three residues to alanines. We then used these recombinant proteins as substrates in an *in*  
129 *vitro* kinase assay (Fig. 1B). The wild type C-terminal KNL-2 fragment was phosphorylated by CDK-1,  
130 whereas mutation of all three putative phosphosites to alanines completely prevented  
131 phosphorylation. For all single and double S/T to A substitutions, phosphorylation remained  
132 detectable. CDK-1 is therefore able to phosphorylate each of the three residues, and does not target  
133 other sites within the KNL-2 C-terminal fragment.

134 Next, to test the role of KNL-2 phosphorylation *in vivo*, we engineered *knl-2* alleles containing  
135 substitutions of T750, S772 and S784 to alanines in different combinations using the CRISPR/Cas9  
136 system. Since the deletion of the *knl-2* gene or the depletion of *knl-2* by RNAi leads to severe  
137 impairment of cell division and death at early embryonic stages (Maddox et al., 2007), we first scored  
138 embryonic lethality levels of the KNL-2 phosphodeficient mutants. We carried out the analysis at two  
139 different temperatures: 20°C (permissive temperature), optimal for worm culturing, and 25°C  
140 (restrictive temperature), inducing mild temperature stress. The worms bearing single mutation  
141 alleles (KNL-2 T750A, S772A or S784A) were superficially wild type, and exhibited wild type levels of  
142 embryonic lethality at both tested temperatures (Fig. 1C). However, the double mutant S772A/S784A  
143 showed around 25% embryonic lethality at 20°C, and around 75% at 25°C. The triple mutated allele  
144 (KNL-2 T750A/S772A/S784A) caused 100% embryonic lethality at both tested temperatures. The  
145 strain can be maintained at 15°C, where a few progeny survive to adulthood. The observed increase  
146 in severity of the phenotype when combining mutations suggests that these three phosphosites act  
147 in a coordinative manner. Since complete loss of KNL-2 function causes fully penetrant embryonic  
148 lethality, the KNL-2 T750A/S772A/S784A and S772A/S784A mutants exhibit a partial loss-of-function  
149 in addition to being thermosensitive.

150 To examine the molecular defects underlying the observed embryonic lethality, we focused our  
151 further analyses on the strain bearing the KNL-2 S772A and S778A mutations, since it offered the  
152 advantage of studying the phenotypic defects at permissive and restrictive temperatures. Using live  
153 cell imaging, we examined the progression of the first embryonic division in the S772A/S784A strain  
154 expressing GFP::H2B to mark chromatin and GFP:: $\gamma$ -tubulin to mark the spindle poles (Fig. 1D, Movies  
155 1, 2). Compared to the control, the division in S772A/S784A embryos looked defective at several  
156 stages: before the nuclear envelope breakdown (NEB), the chromatin appeared more diffuse,  
157 indicating potential alterations in chromosome condensation. Cells also exhibited problems in  
158 chromosome congression and metaphase plate formation, resulting in disordered metaphase plates.  
159 Clear anaphase bridges appeared in all tested cells, indicating errors in chromosome segregation.  
160 These defects were apparent at both permissive and restrictive temperatures (Fig. 1D; Fig. S1C), but  
161 more pronounced at 25°C (best visible in Movies 1 and 2). Meiotic divisions in the S772A/S784A  
162 strain also exhibited anaphase bridges (Fig. 1E). Compromised fidelity of chromosome segregation  
163 during meiosis frequently leads to aneuploidy, which is concomitant with the elevated embryonic  
164 lethality observed in the S772A/S784A strain. The triple mutant T750A/S772A/S784A exhibited  
165 chromosome segregation defects in mitosis and meiosis that are similar to those observed in the  
166 S772A/S784A strain even when grown at the permissive temperature for this strain (15°C; Fig. S1D),  
167 supporting the hypothesis that all three phosphorylation sites are involved in regulating the same  
168 process.

169 We conclude that KNL-2 residues T750, S772 and S784 are targets for phosphorylation, likely  
170 mediated by CDK-1, and work in coordination to regulate KNL-2 functions during cell division.

### 171 **KNL-2 functions in centromere and kinetochore formation are not impaired in the S772A/S784A** 172 **mutant**

173 In *C. elegans* embryos, KNL-2 and CENP-A are interdependent for centromeric localisation and  
174 required for kinetochore assembly (Maddox et al., 2007; Oegema et al., 2001). Depletion of *knl-2* by  
175 RNAi leads to loss of CENP-A from chromatin and a kinetochore null phenotype, characterised by a  
176 complete failure in recruiting other kinetochore proteins (Maddox et al., 2007). We tested if the  
177 severe chromosome segregation defects in the S772A/S784A strain resulted from disrupting the KNL-  
178 2 function in CENP-A loading or kinetochore formation. We performed these analyses on worms after  
179 shifting them to 25°C, where we observed more penetrant phenotypes. We first checked the  
180 localisation of KNL-2 and CENP-A (Fig. 2A). In the wild type strain, both proteins were chromatin-  
181 bound and followed a similar localisation pattern throughout the division, forming a railroad track-  
182 like appearance characteristic for *C. elegans* holocentromeres on prometaphase chromosomes and

183 poleward bi-orientation at metaphase (Buchwitz et al., 1999; Maddox et al., 2007). In the  
184 S772A/S784A mutant, these patterns were overall preserved, suggesting that KNL-2 and CENP-A  
185 localisation were not defective, although the morphology of the chromosomes appeared altered. In  
186 prometaphase, both KNL-2 and CENP-A were chromatin-bound and localised on the face of the  
187 chromosomes. The poleward appearance of KNL-2 and CENP-A on metaphase plates was slightly  
188 perturbed in the S772A/S784A strain due to some chromosomes not achieving bi-orientation. This  
189 observation suggests uncorrected merotelic spindle attachments and is consistent with chromosome  
190 bridges detected in the S772A/S784A mutant in anaphase (Fig. 2A).

191 Levels of chromatin-bound KNL-2, determined by measuring GFP::KNL-2 signal on mitotic  
192 chromosomes at metaphase, were similar in wild type and in S772A/S784A cells, indicating that the  
193 phosphosite mutations did not affect protein stability or chromatin association (Fig. 2B). Given that  
194 KNL-2 is required for CENP-A loading onto chromatin (Maddox et al., 2007), we measured the  
195 metaphase levels of GFP::CENP-A in the S772A/S784A background and found no significant change in  
196 comparison to the levels in the wild type strain (Fig. 2C). Phosphorylation of serines 772 and 784 is  
197 therefore not involved in regulating the KNL-2 function in CENP-A loading.

198 Depletion of KNL-2 results in a complete failure to recruit other kinetochore proteins (Maddox et al.,  
199 2007). To test if the observed mitotic defects in the S772A/S784A strain are caused by defects in  
200 kinetochore assembly, we analysed the localisation of fluorescently tagged kinetochore subunits  
201 CENP-C, ROD-1, KNL-1 and BUB-1. CENP-C is the only identified inner kinetochore protein in *C.*  
202 *elegans* and is necessary for the recruitment of all outer kinetochore proteins (Cheeseman et al.,  
203 2004; Oegema et al., 2001). mCherry::CENP-C levels on mitotic chromosomes at metaphase were  
204 comparable in wild type and S772A/S784A strains (Fig. 2D). CENP-C localisation remained unaffected  
205 as well (Fig. S2). The outer kinetochore subunits BUB-1, ROD-1 and KNL-1 also localised to metaphase  
206 plates in an expected manner in the S772A/S784A strain (Fig. 2E and Fig. S2), in contrast to almost  
207 complete depletion from chromatin after *knl-2* RNAi (Fig. 2E). Although the chromosome alignment  
208 defects at metaphase and chromosome bridges suggest kinetochore-spindle attachment defects,  
209 kinetochore assembly itself appears normal in the S772A/S784A mutant. We conclude that  
210 phosphorylation of KNL-2 on S772 and S784 is not required for centromere formation or kinetochore  
211 assembly in *C. elegans* embryos.

## 212 **Chromosome condensation is impaired in the S772A/S784A mutant**

213 Previous studies have shown that chromosome condensation is impaired in *C. elegans* cells depleted  
214 of KNL-2 or CENP-A (Chan et al., 2004; Hagstrom et al., 2002; Maddox et al., 2007, 2006), but did not  
215 address if these condensation defects were a consequence of centromere loss. Since we found that

216 phosphodeficient KNL-2 did not alter CENP-A loading and centromere formation, we considered that  
217 it could affect chromosome condensation directly. We therefore investigated the dynamics of  
218 chromosome condensation in the *S772A/S784A* strain in more detail. The changes of GFP::H2B signal  
219 distribution in time in the male pronucleus have previously been used as an indicator of the  
220 progression of mitotic chromosome formation (Maddox et al., 2006). This method results in a  
221 quantifiable condensation parameter that corresponds to the level of chromatin compaction. We  
222 followed the mitotic chromosome formation in wild type and *S772A/S784A* strains at 25°C. Depletion  
223 of HCP-6, which encodes a subunit of condensin II complex (Csankovszki et al., 2009; Stear and Roth,  
224 2002), served as a control for chromosome condensation failure (Fig. 3A, B). In the wild type,  
225 chromatin condensed steadily, as shown by an almost linear increase of the condensation parameter  
226 (Fig. 3A, B). Mitotic chromosomes started to form around 240 s before NEB. In the *S772A/S784A*  
227 mutant, condensation was delayed. An increase in the condensation parameter and visible mitotic  
228 chromosome formation appeared only around 90 s before NEB (Fig. 3A, B). We observed a similar  
229 delay upon condensin II depletion (*hcp-6* RNAi; Fig. 3A, B).

230 Despite condensation being clearly impaired in the *S772A/S784A* strain, six separate mitotic  
231 chromosomes eventually formed. Their morphology was, however, largely different than in the wild  
232 type (Fig. 3A,C). In wild type embryos, chromosomes had a rod-like appearance and looked rigid (Fig.  
233 3C), whereas in the *S772A/S784A* strain, they appeared more ribbon-like and flexible (Movie 2).  
234 Depletion of *hcp-6* by RNAi had a similar effect on the morphology of the chromosomes as the  
235 *S772A/S784A* mutation (Fig. 3C, Movie 3). Close examination of prometaphase chromosomes in fixed  
236 samples showed that they were prone to twisting around their own axis in the *S772A/S784A* strain,  
237 resulting in a criss-cross pattern of CENP-A staining, markedly different from the normal railroad  
238 track-like CENP-A appearance in the wild type. We observed a similar twisting of chromosomes upon  
239 *hcp-6* RNAi, in agreement with previous reports (Stear and Roth, 2002) (Fig. 3C).

240 The compromised chromosome segregation and increased embryonic lethality in the *S772A/S784A*  
241 strain were already observable at the permissive temperature, albeit at lower levels compared to the  
242 restrictive temperature (Fig. 1, Movies 1, 2). To test if the condensation defects also explain the  
243 phenotypes at the permissive temperature, we repeated the analysis of the dynamics of  
244 chromosome condensation in this condition (Fig. S3 A, B). We found that it was impaired, but  
245 seemingly to a lesser degree than at the restrictive temperature (Fig. 3A-B). The condensation  
246 defects and consequently the segregation problems are therefore exacerbated rather than triggered  
247 by the elevated temperature.



248 Condensin depletion does not only affect mitosis, but also leads to changes in meiotic chromosome  
249 morphology and defects in meiotic divisions (Chan et al., 2004; Houlard et al., 2015; Yu and Koshland,  
250 2003). *C. elegans* germ cells move through the gonad from distal to proximal zone as they progress  
251 through meiosis. CENP-A and KNL-2 are present on chromatin in the mitotically proliferating zone  
252 (distal zone), then they are removed at the onset of meiosis (transition zone) and associate with  
253 chromatin again in diplotene (proximal zone) (Gassmann et al., 2012; Maddox et al., 2007; Prosée et  
254 al., 2020). We investigated chromosome morphology in the S772A/S784A meiotic germ cells and  
255 found that it was altered in the proximal zone of the germ line, but seemed unaffected in the  
256 pachytene zone (Fig. 3D). The observed meiotic condensation defects were thus only observed in  
257 regions of the germ line where KNL-2 and CENP-A are present. Early diakinetid nuclei typically contain  
258 well defined bivalents, but in the S772A/S784A strain individual chromosomes were hardly  
259 distinguishable at these stages (Fig. 3D). The differences between the S772A/S784A mutant and the  
260 wild type became less pronounced as oocyte maturation progressed, and in late diakinetid oocytes,  
261 six individual chromosome tetrads were visible in both strains (Fig. 3D). The localisation of KNL-2  
262 remained unaffected, similarly to what we observed for embryonic cells (Fig. 3D). Our results suggest  
263 that phosphorylation of the KNL-2 C-terminus is not only regulating mitotic chromosome  
264 condensation, but plays a similar role in meiotic diplotene and diakinesis stages.

265 Condensation failure has previously been shown to cause segregation problems (Chan et al., 2004;  
266 Csankovszki et al., 2009; Hagstrom et al., 2002; Hudson et al., 2003; Maddox et al., 2006; Oliveira et  
267 al., 2005; Ono et al., 2004; Samoshkin et al., 2009; Steffensen et al., 2001). To assess whether the  
268 aberrant segregation in the S772A/S784A strain is a consequence of faulty mitotic chromosome  
269 formation, we examined the first embryonic mitoses in this strain and after *hcp-6* RNAi in the wild  
270 type strain (Fig. S3C-E). To compare the progression of the division, we examined the NEB-to-  
271 anaphase onset interval and measured the spindle pole distance over time (Fig. S3C,D). Both  
272 S772A/S784A mutation and depletion of *hcp-6* caused similar defects: chromosome congression  
273 problems and clear anaphase bridges (Fig. S3E, Movies 2, 3). The kinetics of spindle pole separation  
274 was comparable in *hcp-6* depleted embryos and in the S772A/S784A strain, showing slightly  
275 premature pole separation relative to wild type (Fig. S3D). This premature pole separation may be a  
276 consequence of delayed formation of attachments between kinetochores and microtubules, rather  
277 than of defects in kinetochore assembly, as we found that kinetochore proteins localise normally in  
278 the S772A/S784A strain (Fig. 2D, E). The time between NEB and anaphase onset was comparable for  
279 both S772A/S784A strain and *hcp-6* depletion, and longer than in the wild type (on average 198 s for  
280 S772A/S784A, 212 s for *hcp-6* RNAi, and 151 s in the wild type), as expected from the observed  
281 defects in chromosome congression and formation of the metaphase plate (Fig. S3 E). Together,

282 these results indicate that depletion of *hcp-6* causes mitotic defects reminiscent of the ones  
283 observed in the S772A/S784A strain, suggesting that the segregation defects are indeed a  
284 downstream consequence of condensation problems. We conclude that phosphorylation of KNL-2  
285 S772 and S784 is required for chromosome condensation during meiosis and at the onset of mitosis.

#### 286 **Condensin II levels are reduced on metaphase chromosomes in the S772A/S784A mutant**

287 Since we found that the combined mutation of KNL-2 S772 and S784 to alanines affected  
288 chromosome condensation independently of centromere formation, and that depletion of condensin  
289 II resulted in similar phenotypic defects, we hypothesised that phosphorylation of S772 and S784  
290 might be required for condensin recruitment or maintenance. As in most eukaryotes, the *C. elegans*  
291 genome encodes two condensin complexes responsible for mitotic chromosome formation, called  
292 condensin I and condensin II (Csankovszki et al., 2009). Each complex consists of five subunits: two  
293 structural maintenance of chromosomes (SMC) subunits and three accessory subunits (Csankovszki  
294 et al., 2009; Ono et al., 2003). While SMC subunits are shared by both condensin complexes, the  
295 accessory subunits are unique for each condensin complex: DPY-28 (CAP-D2), CAPG-1 (CAP-G) and  
296 DPY-26 (CAP-H) for condensin I, and HCP-6 (CAP-D3), CAPG-2 (CAP-G2) and KLE-2 (CAP-H2) for  
297 condensin II (Csankovszki et al., 2009; Hirano, 2012). We used GFP-tagged KLE-2 for visualising  
298 condensin II and GFP-tagged CAPG-1 for condensin I. Both complexes exhibited the same subcellular  
299 localisation and nuclear dynamics in wild type and S772A/S784A embryos (Fig. 4A, Movies 4, 5).  
300 Condensin II localised to the nucleus already in prophase, whereas condensin I associated with the  
301 forming chromosomes after NEB. Both complexes remained chromatin bound for the remaining  
302 stages of mitosis. The observed mitotic defects in the S772A/S784A mutant are therefore unlikely to  
303 be caused by altered timing of condensin localisation.

304 We next tested if S772A/S784A mutants were defective in condensin recruitment or maintenance.  
305 We quantified the levels of GFP::KLE-2 and GFP::CAPG-1 on mitotic chromosomes at metaphase. The  
306 mean levels of GFP::KLE-2 were significantly lower in the S772A/S784A mutant compared to the wild  
307 type (around 60% of the wild type level) (Fig. 4B). This result suggests that phosphorylation of KNL-2  
308 is involved in regulating condensin II levels on mitotic chromosomes. Consistent with this  
309 observation, depletion of *knl-2* by RNAi also resulted in reduced levels of GFP::KLE-2, to an even  
310 greater degree than S772A and S784A mutations (26% of the wild type level). Total GFP::KLE-2 levels  
311 in embryonic lysates were similar in the wild type and in the S772A/S784A strain, as determined by  
312 western blot (Fig. S4A), indicating that the stability of the condensin II complex was not affected.  
313 Over the course of interphase, the nuclear levels of GFP::KLE-2 were comparable in both strains (Fig.  
314 S4B), suggesting that KLE-2 import into the nucleus was not majorly affected either. We therefore

315 conclude that a specific phosphorylation status of the KNL-2 C-terminal region is required for  
316 condensin II to properly associate with chromatin during mitotic chromosome formation. Similar  
317 effects of the S772A/S784A mutations on GFP::KLE-2 levels were visible at the permissive  
318 temperature (20°C, Fig. S4C), concomitant with the condensation defect observed in this condition.

319 We next tested if the S772A/S784A mutations also affected the condensin I complex. Condensin I  
320 levels, measured by GFP::CAPG-1 signal on metaphase plates, were elevated in the S772A/S784A  
321 embryos in comparison to the wild type (Fig. 4C), while total protein levels in embryonic lysates  
322 remained unchanged (Fig. S4A). Depletion of *knl-2* by RNAi also resulted in increased GFP::CAPG-1  
323 levels at metaphase. This increase is likely a downstream consequence of decreased condensin II  
324 levels, since depletion of *hcp-6* by RNAi mirrored this effect (Fig. 4C). These observations suggest that  
325 condensin I levels increase to compensate for the insufficient levels of condensin II on mitotic  
326 chromosomes.

327 We conclude that lack of phosphorylation of KNL-2 S772 and S784 leads to reduced levels of  
328 condensin II on mitotic chromosomes. This reduction of condensin II explains the condensation  
329 defects and altered chromosome morphology observed in S772A/S784A mutant embryos and the  
330 proximal part of the germ line, and likely underlies the chromosome segregation defects and the  
331 embryonic lethality.

## 332 **DISCUSSION**

### 333 **The role of *C. elegans* KNL-2 in chromosome condensation is distinct from its function in CENP-A** 334 **loading**

335 We found that the centromeric protein KNL-2 is involved in regulating chromosome condensation in  
336 the holocentric nematode *C. elegans* through the phosphorylation status of its C-terminal region  
337 established by CDK-1. Abolishing this phosphorylation results in reduced levels of condensin II on  
338 mitotic chromatin, aberrant chromosome morphology and segregation defects, but has no effect on  
339 CENP-A loading and kinetochore assembly. Our results suggest that KNL-2 has taken on a direct role  
340 in regulating mitotic chromosome formation, and that this role is independent from its function in  
341 centromere maintenance.

342 CDK-1-dependent phosphorylation also regulates vertebrate homologues of KNL-2, M18BP1, in  
343 human cells (McKinley and Cheeseman, 2014; Pan et al., 2017; Silva et al., 2012; Spiller et al., 2017;  
344 Stankovic et al., 2017), and *Xenopus laevis* (French and Straight, 2019). M18BP1 is a subunit of the  
345 MIS18 complex required for the initiation of CENP-A loading (French and Straight, 2017; Fujita et al.,  
346 2007; Hayashi et al., 2004; Hori et al., 2017; Moree et al., 2011; Pan et al., 2019). Phosphorylation of

347 human M18BP1 by CDK-1 regulates MIS18 complex formation and localisation ensuring the proper  
348 timing of CENP-A loading (Foltz et al., 2009; Pan et al., 2017; Spiller et al., 2017).

349 Although KNL-2 is also indispensable for CENP-A loading in worms (Maddox et al., 2007), we found  
350 that in contrast to the role of M18BP1 phosphorylation in vertebrates, CDK-1-dependent  
351 phosphorylation of KNL-2 S772 and S784 is not required for CENP-A loading (Fig. 2), but instead for  
352 chromosome condensation (Fig. 3). These KNL-2 residues are located in a C-terminal region that is  
353 not conserved between nematodes and vertebrates, but is conserved within the *Caenorhabditis*  
354 genus (Fig. S1A), indicating that this phosphoregulation and its role in chromosome condensation  
355 might be present also in other holocentric nematodes.

### 356 **The regulation of chromosome condensation by centromeres**

357 Indication that the centromeres might be involved in regulating chromosome condensation in *C.*  
358 *elegans* comes from early work where disrupting centromeric chromatin by depleting CENP-A or KNL-  
359 2 has been shown to lead to dramatic condensation defects (Chan et al., 2004; Hagstrom et al., 2002;  
360 Maddox et al., 2007, 2006). Aside from *C. elegans*, a regulatory role of centromeres in mitotic  
361 chromosome condensation has only recently been described in *Saccharomyces cerevisiae*, where  
362 centromeres act as the initiation sites for condensation, triggering a regulatory cascade that spreads  
363 along the chromosome arms (Kruitwagen et al., 2018). For holocentric chromosomes, such a  
364 spreading mechanism would appear redundant, as centromeres are distributed along the length of  
365 the entire chromosomes.

366 In agreement with previous observations, we show that the centromeric protein KNL-2 is involved in  
367 chromosome condensation, as it regulates condensin II levels on chromatin. However, we found that  
368 CENP-A loading is preserved in the S772A/S784A strain (Fig. 2), suggesting that correctly maintained  
369 centromeric chromatin is insufficient to ensure proper condensin II targeting. The notion that  
370 chromosome condensation is regulated independently of CENP-A in *C. elegans* is supported by the  
371 observations that the depletion of either of the SMC subunits SMC-4 and MIX-1 does not prevent  
372 CENP-A chromatin binding (Chan et al., 2004; Hagstrom et al., 2002) and depletion of CAPG-1 or  
373 CAPG-2 (condensin I or II, respectively) has no detectable effect on CENP-A levels on endogenous  
374 chromosomes (Lin and Yuen, 2021). It is likely that the previously observed condensation defects  
375 upon CENP-A depletion were caused by the simultaneous loss of KNL-2, the C-terminal  
376 phosphorylation status of which is crucial to regulate the mitotic chromosome formation.

### 377 **KNL-2 C-terminal phosphorylation regulates condensin complex levels on mitotic chromosomes**

378 The reduced levels of the condensin II complex on chromosomes in the phosphodeficient KNL-2  
379 strain (Fig. 4) could be caused by delayed or less efficient condensin II recruitment to chromatin.  
380 Alternatively, the condensin II complex might be properly recruited, but not retained on chromatin in  
381 S772A/S784A mutants due to weaker or less stable chromatin binding. Considering that condensin II  
382 achieves a stable chromatin association during prophase in human cells (Gerlich et al., 2006), we  
383 favour the hypothesis of condensin II being less efficiently recruited to chromatin in the  
384 S772A/S784A strain. It has recently been observed that when KNL-2 loses its interaction with CENP-  
385 A, it fails to localise to chromatin, and chromosome condensation becomes defective (Prosée et al.,  
386 2020). This suggests that KNL-2 chromatin association precedes condensin II recruitment.

387 Condensin I targets chromatin independently from condensin II (Green et al., 2012; Hirota et al.,  
388 2004; Ono et al., 2003) and performs distinct functions in mitotic chromosome formation (Gibcus et  
389 al., 2018; Ono et al., 2004). The elevated levels of condensin I on metaphase chromosomes in the  
390 S772A/S784A strain are likely a secondary effect of the condensin II depletion from chromatin, as we  
391 observed a similar effect after *hcp-6* RNAi (Fig. 4). Condensin I over-recruitment may compensate for  
392 partial depletion of condensin II. It is possible that when one of the complexes is depleted, some  
393 condensin binding sites on chromatin are left unoccupied, and the other complex binds or spreads to  
394 them instead. A similar effect has been observed in *X. laevis*, where after condensin I depletion,  
395 condensin II became enriched on chromosome arms (Hirota et al., 2004). We note, however, that the  
396 condensin I marker used here (CAPG-1) has other documented roles during cell division, as it  
397 accumulates on chromosomal bridges, spindle midzone and midbody in later stages of mitosis  
398 (Bembenek et al., 2013). We therefore cannot exclude that the increased presence of CAPG-1 on the  
399 metaphase chromosomes is in relation to its other functions, rather than to its canonical condensin I  
400 roles.

401 In the T750A/S772A/S784A strain, which lacks an additional phosphorylation site at the KNL-2 C-  
402 terminus, the cell division defects are more severe than in the S772A/S784A mutant (Figs. 1, S1).  
403 These defects are likely caused by further decrease in condensin II levels and more pronounced  
404 condensation impairment. However, in contrast to the fully penetrant embryonic lethality upon  
405 condensin II depletion, the T750A/S772A/S784A strain is viable at 15°C, suggesting that condensin II  
406 recruitment to the chromatin is not completely abolished when the KNL-2 C-terminus is not  
407 phosphorylated. Therefore, additional unidentified KNL-2 phosphosites might be involved in the  
408 regulation of chromosome condensation. Alternatively, KNL-2-dependent condensin II recruitment  
409 could be redundant with other regulatory pathways.

410 **Chromosome morphology is sensitive to condensin II levels and correlates with downstream**  
411 **defects**

412 Due to decreased levels of condensin II complex on chromatin, mitotic chromosomes in the  
413 S772A/S784A strain lacked normal rigidity and were prone to twisting around their axis (Figs. 3, 4). In  
414 other species the depletion of condensin complexes also did not lead to total condensation failure,  
415 but rather affected the physical properties of chromosomes (Gerlich et al., 2006; Hagstrom et al.,  
416 2002; Hudson et al., 2003; Oliveira et al., 2005; Ono et al., 2003; Steffensen et al., 2001). Specifically,  
417 condensin II depletion resulted in elongation of the chromosomes in human (Gibcus et al., 2018; Ono  
418 et al., 2017, 2003) and chicken cells (Green et al., 2012). In *C. elegans*, HCP-6 depletion caused  
419 chromosomes to twist around their axis (Stear and Roth, 2002), a result reproduced in this study (Fig.  
420 3). Given that we found no evidence for centromere defects in the S772A/S784A strain, we attribute  
421 all its cell division defects to this impaired chromosome morphology. We observed problems with  
422 chromosome congression, bi-orientation, and anaphase bridges, which resemble the defects  
423 observed upon *hcp-6* depletion (Fig. S3). Consistent with our observations, condensin depletion  
424 frequently leads to defects in metaphase plate formation and anaphase bridging (Chan et al., 2004;  
425 Csankovszki et al., 2009; Hagstrom et al., 2002; Hudson et al., 2003; Maddox et al., 2006; Oliveira et  
426 al., 2005; Ono et al., 2004; Samoshkin et al., 2009; Steffensen et al., 2001).

427 **KNL-2 exhibits a similar role in meiotic and mitotic chromosome condensation**

428 Chromosome condensation is essential not only for mitotic, but also for meiotic divisions. We  
429 observed segregation defects in meiosis (Fig. 1) and impaired chromosome morphology in the  
430 proximal zone of the germ line (Fig. 3) in the S772/S784A strain. Interestingly, both KNL-2 and  
431 condensin II subunits show a discontinued pattern of chromatin association in the *C. elegans* germ  
432 line. KNL-2 is present in the mitotic zone, then removed at the entry to meiotic prophase and  
433 reappears when the cells reach the diplotene stage of meiotic prophase (Prosée et al., 2020). The  
434 condensin II complex, although present in all germline nuclei, is chromatin-bound only in the mitotic  
435 zone, diplotene and diakinesis (Chan et al., 2004). The apparent overlap between the stage when  
436 KNL-2 and condensin II re-associate with chromatin and the onset of condensation defects in the  
437 S772A/S784A strain suggests that the same mechanism of KNL-2-dependent condensin II recruitment  
438 is compromised in S772A/S784A strain in mitosis and meiosis. Consistent with our observations, HCP-  
439 6 mutants exhibit condensation defects in diplotene-stage nuclei, but not in pachytene nuclei (Chan  
440 et al., 2004). A recent study found that CDK-1 acute depletion causes chromosome morphology  
441 changes in the proximal zone of the germ line (Brandt et al., 2020). These changes are similar to

442 those observed in the S772A/S784A strain, further strengthening our hypothesis of CDK-1  
443 involvement in the regulation of KNL-2 function in chromosome condensation.

444 Taken together, we show that the centromeric protein KNL-2 plays a direct regulatory role in  
445 chromosome condensation. We propose that KNL-2 integrates the crosstalk between the  
446 condensation machinery and the centromeres. The separation-of-function alleles generated in this  
447 study allow to disentangle the roles of KNL-2 in centromere maintenance and chromosome  
448 condensation, and are a first step towards deciphering the mechanism of centromere involvement in  
449 chromosome condensation in *C. elegans*.

## 450 **MATERIALS AND METHODS**

### 451 **Worm maintenance**

452 Worms were cultured according to standard procedures (Brenner, 1974) on NGM (nematode growth  
453 medium) plates seeded with OP50 bacteria. The worms were maintained at 20°C or 15°C (for *ts*  
454 strains) and shifted to 25°C for analysis, as indicated.

### 455 **Strain construction**

456 Strains are listed in Table S2. CRISPR/Cas9 was used for modifying endogenous loci as described  
457 previously (Arribere et al., 2014). For the point mutation T750A and small tag insertion (OLLAS, HA),  
458 oligonucleotides were used as repair templates. For mutating serines 772 and/or 784, two cuts were  
459 introduced, and a *knl-2* fragment (of 712 bp) containing the mutations and a C-terminal OLLAS tag  
460 was PCR-amplified from pJW56 or pJW57 plasmids (Table S3) and used as a repair template. For  
461 introducing fluorescent tags (GFP and mCherry) the repair templates were generated by PCR with  
462 primers containing ~50bp overhangs with homology to the target locus. Transgenic *gfp::knl-2*  
463 constructs were introduced by MosSCI (Frøkjær-Jensen et al., 2014). Genomic sequence of *knl-2*  
464 locus with S772A and S784A mutations, its promoter and 3'UTR regions were cloned into the  
465 pCFJ151 vector together with 3xFLAG and GFP coding sequences. Table S3 contains the names of  
466 plasmids and sequences of sgRNAs used for strain generation. All other strains were obtained by  
467 genetic crossing.

### 468 **Embryonic viability assessment**

469 10 L4 hermaphrodites were singled on NGM plates seeded with a small amount of OP50 bacteria and  
470 maintained at 20°C or 25°C until the young adult worms laid 20-40 eggs. The worms were then  
471 removed and the number of eggs counted. The plates were incubated for another 20-30 h and the L1

472 hatchlings were counted. The embryonic lethality was assessed as the difference between the  
473 number of laid eggs and the number of hatchlings. The experiment was repeated three times for  
474 each condition.

#### 475 **RNA interference**

476 Bacteria expressing specific dsRNAs were obtained from the Ahringer library (Source BioScience) and  
477 the RNAi experiments were performed by feeding as described previously (Kamath et al., 2001) with  
478 minor modifications. Briefly, an overnight culture of dsRNA expressing bacteria was diluted 50 times  
479 (to OD~0.05-0.1) in LB media containing ampicillin. Expression of dsRNA was induced with 1 mM IPTG  
480 when the culture reached OD~0.6-0.8. After 4 h, bacteria were concentrated 50 times and used to  
481 seed NGM plates supplemented with 1 mM IPTG and carbenicillin. L4 hermaphrodites were put on  
482 RNAi plates for 18-20 h at 25°C or 24 h at 20°C.

#### 483 **Antibodies and western blotting**

484 For generating embryonic lysates, gravid adult hermaphrodites were bleached to release embryos.  
485 The embryo pellet was resuspended in 2-3 volumes of lysis buffer (8 mM Na<sub>2</sub>HPO<sub>4</sub>, and 2 mM KH<sub>2</sub>PO<sub>4</sub>,  
486 137 mM NaCl, 100 mM KCl, 1mM MgCl<sub>2</sub>, 1 mM EGTA, 10% glycerol, 1% CHAPS, 1 mM PMSF) and  
487 snap-frozen in liquid nitrogen. To break the embryo shells and shear chromatin, the samples were  
488 sonicated with the Bioruptor Pico (Diagenode) machine (10 cycles: 30s ultrasound, 30s rest) with  
489 occasional re-freezing in liquid nitrogen. The lysates were cleared by centrifugation (21'000 g, 15  
490 min) and the protein amount was quantified with the use of Bio-Rad Protein Assay (Bio-Rad,  
491 5000006). For western blotting the following primary antibodies were used: anti-tubulin (Abcam,  
492 ab6160), anti-GFP (Abcam, ab290). The LI-COR Odyssey system with fluorescent secondary  
493 antibodies (IRDye) was used for detection.

#### 494 **Immunoprecipitation, mass spectrometry and phosphosites identification**

495 Immunoprecipitations were performed as described previously (Prosée et al., 2020). Briefly, embryos  
496 obtained by bleaching were snap-frozen in RIPA buffer (50 mM Tris-HCl pH = 7.4, 500 mM NaCl,  
497 0.25% deoxycholate, 10% glycerol, 1% NP-40, 2 mM DTT, EDTA-free protease inhibitor cocktail  
498 (Roche), PhosSTOP (Roche)), sonicated for 15 cycles, and lysates cleared by centrifugation for 30  
499 minutes (sonication and centrifugation parameters as above). Lysates were incubated overnight at  
500 4°C with Pierce Anti-HA Magnetic Beads (Thermo Fisher Scientific). Beads were then washed, and  
501 boiled in Pierce Lane Marker Non-Reducing Sample Buffer (Thermo Fisher Scientific). The eluates  
502 were analysed by the Proteomic Facility at the Functional Genomics Center Zurich. Samples were



503 processed according to standard procedures used by the facility. The proteins were precipitated with  
504 trichloroacetic acid, washed with acetone, resuspended and digested with trypsin. Samples were  
505 then dried, dissolved in 0.1% formic acid and ca. 10% of the sample was injected into the LC/MS/MS  
506 system. The raw files produced by the spectrometer were processed with MaxQuant version 1.6.0.16  
507 (Cox and Mann, 2008). Peptide searches were run against the *C. elegans* proteome (UP000001940)  
508 with the following parameters: minimal peptide length: 7 aa, maximum 2 missed cleavages (trypsin/p  
509 digestion), False Discovery Rate: 0.05, modifications: N-terminal acetylation, methionine oxidation  
510 and phosphorylation (STY), maximum 5 modifications per peptide allowed. Identified Peptide  
511 Spectrum Matches containing a putative phosphorylation and mapping to KNL-2 were then further  
512 manually inspected.

### 513 **Expression and purification of recombinant proteins**

514 The sequence encoding the C-terminal KNL-2 fragment (residues 617-877) was cloned into a vector  
515 derived from pET allowing for expression in *E. coli* as a fusion protein with a TEV cleavage site and a  
516 His<sub>6</sub>-GST tag at the C-terminus. The mutations T750A, S772A and S784A in different combinations  
517 were introduced by the Quick Change Mutagenesis Kit (Stratagene). The recombinant proteins were  
518 overexpressed in *E. coli* Rosetta2, grown in 2xYT media at 37°C for 4 h followed by overnight  
519 induction at 18°C with 0.1 mM isopropyl-β-D-thiogalactopyranoside (IPTG). Induced cells were  
520 harvested by centrifugation and resuspended in lysis buffer (50 mM phosphate buffer pH 8.0, 600  
521 mM NaCl, 10% glycerol, 25 mM imidazole, 0.15% CHAPS, 5 mM β-mercaptoethanol, 1 μg/ml DNase,  
522 1 μg/ml lysozyme, 1 mM PMSF, 1 μg/ml leupeptin, and 2 μg/ml pepstatin). Cells were lysed using an  
523 Emulsiflex system (AVESTIN) and cleared by centrifugation at 15 000 rpm for 45 min at 4°C. The  
524 soluble fraction was subjected to an affinity purification using a chelating HiTrap FF crude column (GE  
525 Healthcare) charged with Ni<sup>2+</sup> ions on an AKTA-HPLC purifier (GE Healthcare). The proteins were  
526 washed with lysis buffer containing 300 mM NaCl, and eluted with 300 mM NaCl and 250 mM  
527 imidazole. The purest fractions were combined and passed over a desalting column (GE Healthcare).  
528 The TEV cleavage was performed overnight at 8°C with a His<sub>6</sub>-tagged TEV protease at a ratio of 1:20.  
529 The sample was reloaded on the Ni-NTA column and the flow-through containing the pure protein  
530 was collected. Samples were concentrated (Amicon 30 kDA) and loaded on a Superdex GF75 Increase  
531 column. The pure proteins were concentrated to about 1-1.2 mg/ml.

### 532 **Kinase Assay**

533 Each reaction (total volume: 10 μl) contained 1 μg recombinant protein, 0.25 mM cold ATP, 5 μCi  
534 γ<sup>32</sup>P-ATP and 350 ng CDK1/Cyclin B Recombinant Human Protein (Thermo Fisher PV3292) in kinase

535 buffer (50 mM HEPES pH 7.5, 10 mM MgCl<sub>2</sub>, 1 mM EGTA, 0.01% Brij-35) supplemented with  
536 PhosSTOP (Sigma-Aldrich) and Complete EDTA-free proteases inhibitors (Sigma-Aldrich). The samples  
537 were incubated at 30°C for 10 min. The reactions were stopped by adding 3x Laemmli sample buffer  
538 and boiling at 95°C for 5 min. The samples were then resolved on a 10% acrylamide gel. The gel was  
539 stained with Coomassie, dried and exposed to a phosphoimager screen (GE Healthcare). The results  
540 were analysed with a Typhoon FLA 9500 (GE Healthcare).

#### 541 **Staining and imaging of fixed samples**

542 Young adult hermaphrodites were washed twice in PBS with 0.1% Triton X-100 to remove bacteria,  
543 then cut in half in anesthetizing buffer (50 mM sucrose, 75 mM HEPES pH 6.5, 60 mM NaCl, 5 mM  
544 KCl, 2 mM MgCl<sub>2</sub>, 10 mM EGTA pH 7.5, 0.1% NaN<sub>3</sub>). The released embryos were transferred onto  
545 glass slides coated with poly-L-lysine. A coverslip was placed on top and the samples were freeze-  
546 cracked and fixed in cold (-20°C) methanol for 5 min. After two washes in PBS (5 min each) samples  
547 were incubated with primary antibodies overnight at 4°C (anti-HA antibody mAb 42F13, 1:60; anti-  
548 OLLAS antibody Novus Biologicals NBP1-06713B, 1:150). Slides were washed two times in PBS,  
549 incubated with secondary antibody (Alexa Fluor 488 goat anti-mouse, Alexa Fluor 594 goat anti-rat;  
550 1:700) for 1-2 h at room temperature and counterstained with DAPI (2 µg/ml) for 15 min. Samples  
551 were washed once in PBS and mounted in VECTASHIELD Antifade Mounting Medium (Vector  
552 Laboratories). Images were taken with a Leica SP8 confocal microscope, using a 100x oil objective  
553 (aperture: 1.40). Z-stacks with 0.3 µm steps were acquired. For some images the Leica SP8  
554 LIGHTNING function was used for image deconvolution (as indicated in the figure description).  
555 Images were processed with Fiji software (Schindelin et al., 2012): contrast adjusted for display,  
556 maximum intensity Z-projection, Gaussian blur filter (radius: 0.5 pixel).

#### 557 **Live imaging of embryos**

558 L4 hermaphrodites were placed on NGM plates or RNAi plates at 25°C for 18-20 h or 24 h at 20°C  
559 before imaging. Young adult worms were cut in egg buffer (118 mM NaCl, 48 mM KCl, 2 mM CaCl<sub>2</sub>, 2  
560 mM MgCl<sub>2</sub> and 25 mM HEPES pH7.5), and released embryos were mounted on 2% agarose pads. The  
561 imaging was performed on a spinning disc confocal system (Intelligent Imaging Innovations Marianas  
562 SDC) mounted on an inverted Leica DMI microscope (Photometrics Evolve 512) with 63x oil objective  
563 (aperture: 1.4). The microscope was equipped with a temperature chamber set to 25°C or 20°C,  
564 depending on the experiment. For each time series, 10-12 Z-sections of 0.8 µm were taken every 10 s  
565 with 1x1 binning. The Z-position was adjusted manually during the imaging. Lasers were set to 100%  
566 power, the camera intensity was set to 800 and the gain to 3. The exposure time was determined for

567 each fluorescent protein separately. The images were analysed with Fiji software with some steps  
568 partially automated with custom macros (see below).

#### 569 **Quantification of fluorescence intensity on metaphase plates in one-cell embryos**

570 Total intensity of fluorescently-tagged proteins was determined for a time series acquired as  
571 described above. For strains expressing GFP::KLE-2/mCherry::H2B and GFP::CAPG-1/ mCherry::H2B,  
572 images from both channels were recorded simultaneously. Metaphase plate was defined as the last  
573 frame before the anaphase onset, which was defined as the first frame when sister chromatids  
574 appeared to separate. For segmentation, the maximum intensity Z-projections of the mCherry::H2B  
575 images were automatically thresholded using the MaxEntropy function in Fiji. The created mask was  
576 used to select a region of interest (ROI) spanning the metaphase plate. Next, this ROI was expanded  
577 by 5 pixels in each direction to calculate the background levels. SUMstack projections of the  
578 corresponding GFP images (GFP::KLE-2 or GFP::CAPG-1) were used for measurements of total  
579 intensity of each defined ROIs. Then, the mean background value was determined for each  
580 measurement by subtracting the total intensity of the metaphase ROI from the total intensity of the  
581 expanded ROI and dividing the resulting value by the difference in ROI area. The total background for  
582 each measurement was calculated as the metaphase ROI area multiplied by the respective mean  
583 background value. Total background was then subtracted from the total intensity of the metaphase  
584 plate ROI and the resulting values were used in statistical analysis as described below. The analysis of  
585 strains expressing only one fluorescent marker (GFP::CENP-A, GFP::KNL-2 or mCherry::CENP-C) was  
586 done similarly, but the single channel was used for both defining the ROIs and measuring the  
587 intensities.

#### 588 **Quantification of total GFP::KLE-2 nuclear fluorescence signal in one-cell embryos**

589 Total nuclear intensity of GFP::KLE-2 was determined for time series acquired as described above.  
590 Since these conditions do not ensure that the entire volume of both pronuclei is encompassed within  
591 each Z-stack, maximum intensity Z-projections were used for estimations rather than SUMstacks  
592 projections. For segmentation, mCherry::H2B images were contrast adjusted, mean filter (2 pixel  
593 radius) was applied, and images were automatically thresholded using MaxEntropy function in Fiji.  
594 Created masks were used to determine ROIs spanning maternal and paternal pronucleus. ROIs were  
595 then used to measure the total intensity in the corresponding GFP::KLE-2 image. Background was  
596 estimated by manually choosing a region (25x25 pixels) within the cytoplasm and measuring mean  
597 pixel value for each image from the time series. This value was then multiplied by total nuclear ROI  
598 area and subtracted from the sum of integrated intensities for maternal and paternal pronucleus.

599 Resulting corrected total nuclear intensities were divided by total ROI area to obtain mean pixel  
600 values displayed in graphs.

### 601 **Quantification of pole to pole distance in one-cell embryo**

602 Strains expressing  $\gamma$ -tubulin::GFP and GFP::H2B were used for determining the spindle poles  
603 separation over time. Time series were acquired as described above, maximum intensity Z-  
604 projections were used for measurements. The distance between spindle poles was measured  
605 manually with a line tool in Fiji. The measurements were aligned in time relative to the anaphase  
606 onset defined as the first frame when sister chromatids began to separate.

### 607 **Quantification of cell cycle timing**

608 The time between NEB and anaphase onset was measured using the same images as for the pole to  
609 pole separation. NEB was visually determined as the moment when the signal intensity of  
610 nucleoplasmic GFP::H2B becomes indistinguishable from the cytoplasmic background. Anaphase  
611 onset was the first frame when sister chromatids began to separate.

### 612 **Quantification of condensation**

613 Quantification of the condensation parameter was performed as described previously (Maddox et al.,  
614 2006). Images were segmented as for total nuclear signal estimation, except that the Otsu  
615 thresholding function was used. Then, a square ROI of 21x21 pixels was centred on the paternal  
616 nucleus. Distribution of pixel values within each ROI was obtained with Fiji histogram function.

### 617 **Statistical analysis**

618 The values from intensity measurements were normalised by dividing each value by the average of  
619 the control measurements. This sets the average for wild type measurements to 1 in each case. The  
620 data were processed and plotted with the use of R plyr, FSA and ggplot2 packages (Ogle et al., 2021;  
621 Wickham, 2011, 2009). The statistical analysis was performed according to guidelines in (Pollard et  
622 al., 2019) and the custom scripts were based on suggestions therein. Briefly, the normal distribution  
623 of values was assessed by plotting histograms of values for each sample and running a Shapiro-Wilk  
624 test. Next, the variances were calculated for each sample. If the data were distributed normally  
625 (Shapiro-Wilk p-value<0.05), the following tests were used: two-sided Student's t-test for comparing  
626 two samples of similar variances (difference smaller than 3-fold), Welch's t-test for two samples with  
627 different variances, two-sided ANOVA for comparison of more than two samples. ANOVA was  
628 followed by a Tukey-Kramer test as a post-hoc. For experiments where values didn't follow the

629 normal distribution, a non-parametric test was chosen: Kruskal-Wallis test followed by Dunn's post  
630 hoc with Benjamini-Hochberg adjustment of p values. For each test the significance level  $\alpha=0.05$ .

631 In plots, for intensity measurements, the individual values were displayed alongside means with  
632  $\pm 95\%$  confidence intervals. Line plots display only the mean values for each set of measurements and  
633 hence are accompanied with ribbon shading indicating standard deviation (s.d.). Information about  
634 the tests is given in figure legends.

#### 635 **ACKNOWLEDGEMENTS**

636 We thank the Bioimaging Center of the Faculty of Sciences at the University of Geneva, particularly  
637 Jerome Bosset for advice on imaging, and the Proteomic Facility in the Functional Genomics Center  
638 Zurich for proteomic data acquisition. We thank Michael Plank for outstanding advice on mass  
639 spectrometry and MS spectra interpretation, Dario Menendez and Kamila Delaney for some of the  
640 CRISPR injections, Alexandra Bondaz and Simona Abbatemarco for advice on spinning disc  
641 microscopy and data processing, Monica Gotta, Patrick Meraldi and Reto Gassmann for useful advice  
642 and Marina Berti for reagents preparation. We are grateful to past and present Steiner lab members  
643 for helpful discussions and to Monica Gotta, Patrick Meraldi and Isa Özdemir for comments on the  
644 manuscript. We are grateful to Gyorgyi Csankovszki for sharing the EKM36 strain and Reto Gassmann  
645 for sharing the GCP529 strain. Some strains were provided by the CGC, which is funded by the NIH  
646 Office of Research Infrastructure Programs (P40 OD010440). We thank the WormBase.

#### 647 **AUTHOR CONTRIBUTION**

648 JMW and FAS designed the study, JMW performed all genetic, staining, live imaging and genomic  
649 experiments, RFP carried out the IP-MS experiments, CGD performed protein purification and the *in*  
650 *vitro* kinase assays. JMW analysed the data. JMW and FAS wrote the manuscript with input from all  
651 authors. FAS obtained funding.

#### 652 **COMPETING INTEREST**

653 The authors declare no conflict of interest.

#### 654 **FUNDING**

655 The work was financially supported by the Swiss National Science Foundation ([www.snf.ch](http://www.snf.ch), Grants  
656 31003A\_175606 and 310030\_197762 to FAS), and funding from the Republic and Canton of Geneva  
657 (to FAS).

658

659 **DATA AVAILABILITY**

660 All the data are contained within this manuscript and its supplements.

661

662 **REFERENCES**

663 Arribere, J.A., Bell, R.T., Fu, B.X.H., Artiles, K.L., Hartman, P.S., Fire, A.Z., 2014. Efficient marker-free  
664 recovery of custom genetic modifications with CRISPR/Cas9 in *Caenorhabditis elegans*.

665 *Genetics* 198, 837–846. <https://doi.org/10.1534/genetics.114.169730>

666 Bembenek, J.N., Verbrugghe, K.J.C., Khanikar, J., Csankovszki, G., Chan, R.C., 2013. Condensin and the  
667 Spindle Midzone Prevent Cytokinesis Failure Induced by Chromatin Bridges in *C. elegans*

668 Embryos. *Current Biology* 23, 937–946. <https://doi.org/10.1016/j.cub.2013.04.028>

669 Bernad, R., Sánchez, P., Rivera, T., Rodríguez-Corsino, M., Boyarchuk, E., Vassias, I., Ray-Gallet, D.,  
670 Arnaoutov, A., Dasso, M., Almouzni, G., Losada, A., 2011. *Xenopus* HJURP and condensin II

671 are required for CENP-A assembly. *The Journal of Cell Biology* 192, 569–582.

672 <https://doi.org/10.1083/jcb.201005136>

673 Bloom, K., Joglekar, A., 2010. Towards building a chromosome segregation machine. *Nature* 463,

674 446–456. <https://doi.org/10.1038/nature08912>

675 Brandt, J.N., Hussey, K.A., Kim, Y., 2020. Spatial and temporal control of targeting Polo-like kinase

676 during meiotic prophase. *Journal of Cell Biology* 219. <https://doi.org/10.1083/jcb.202006094>

677 Brenner, S., 1974. The Genetics of CAENORHABDITIS ELEGANS. *Genetics* 77, 71–94.

678 Buchwitz, B.J., Ahmad, K., Moore, L.L., Roth, M.B., Henikoff, S., 1999. Cell division: A histone-H3-like

679 protein in *C. elegans*. *Nature* 401, 547–548. <https://doi.org/10.1038/44062>

680 Chan, R.C., Severson, A.F., Meyer, B.J., 2004. Condensin restructures chromosomes in preparation for  
681 meiotic divisions. *The Journal of Cell Biology* 167, 613–625.

682 <https://doi.org/10.1083/jcb.200408061>

683 Cheeseman, I.M., Niessen, S., Anderson, S., Hyndman, F., Yates, J.R., 3rd, Oegema, K., Desai, A., 2004.

684 A conserved protein network controls assembly of the outer kinetochore and its ability to

685 sustain tension. *Genes Dev.* 18, 2255–2268. <https://doi.org/10.1101/gad.1234104>

686 Cox, J., Mann, M., 2008. MaxQuant enables high peptide identification rates, individualized p.p.b.-

687 range mass accuracies and proteome-wide protein quantification. *Nat Biotechnol* 26, 1367–

688 1372. <https://doi.org/10.1038/nbt.1511>

689 Csankovszki, G., Collette, K., Spahl, K., Carey, J., Snyder, M., Petty, E., Patel, U., Tabuchi, T., Liu, H.,

690 McLeod, I., Thompson, J., Sarkesik, A., Yates, J., Meyer, B.J., Hagstrom, K., 2009. Three

691 Distinct Condensin Complexes Control *C. elegans* Chromosome Dynamics. *Current Biology* 19,

- 692 9–19. <https://doi.org/10.1016/j.cub.2008.12.006>
- 693 de Groot, C., Houston, J., Davis, B., Gerson-Gurwitz, A., Monen, J., Lara-Gonzalez, P., Oegema, K.,  
694 Shiau, A.K., Desai, A., 2021. The N-terminal tail of *C. elegans* CENP-A interacts with KNL-2 and  
695 is essential for centromeric chromatin assembly. *MBoC* 32, 1193–1201.  
696 <https://doi.org/10.1091/mbc.E20-12-0798>
- 697 Dunleavy, E.M., Pidoux, A.L., Monet, M., Bonilla, C., Richardson, W., Hamilton, G.L., Ekwall, K.,  
698 McLaughlin, P.J., Allshire, R.C., 2007. A NASP (N1/N2)-Related Protein, Sim3, Binds CENP-A  
699 and Is Required for Its Deposition at Fission Yeast Centromeres. *Molecular Cell* 28, 1029–  
700 1044. <https://doi.org/10.1016/j.molcel.2007.10.010>
- 701 Dunleavy, E.M., Roche, D., Tagami, H., Lacoste, N., Ray-Gallet, D., Nakamura, Y., Daigo, Y., Nakatani,  
702 Y., Almouzni-Pettinotti, G., 2009. HJURP Is a Cell-Cycle-Dependent Maintenance and  
703 Deposition Factor of CENP-A at Centromeres. *Cell* 137, 485–497.  
704 <https://doi.org/10.1016/j.cell.2009.02.040>
- 705 Errico, A., Deshmukh, K., Tanaka, Y., Pozniakovsky, A., Hunt, T., 2010. Identification of substrates for  
706 cyclin dependent kinases. *Advances in Enzyme Regulation* 50, 375–399.  
707 <https://doi.org/10.1016/j.advenzreg.2009.12.001>
- 708 Foley, E.A., Kapoor, T.M., 2013. Microtubule attachment and spindle assembly checkpoint signaling  
709 at the kinetochore. *Nat Rev Mol Cell Biol* 14, 25–37. <https://doi.org/10.1038/nrm3494>
- 710 Foltz, D.R., Jansen, L.E.T., Bailey, A.O., Yates, J.R., Bassett, E.A., Wood, S., Black, B.E., Cleveland, D.W.,  
711 2009. Centromere-Specific Assembly of CENP-A Nucleosomes Is Mediated by HJURP. *Cell*  
712 137, 472–484. <https://doi.org/10.1016/j.cell.2009.02.039>
- 713 French, B.T., Straight, A.F., 2019. CDK phosphorylation of *Xenopus laevis* M18BP1 promotes its  
714 metaphase centromere localization. *The EMBO Journal* e100093.  
715 <https://doi.org/10.15252/emj.2018100093>
- 716 French, B.T., Straight, A.F., 2017. The Power of *Xenopus* Egg  
717 Extract for Reconstitution of Centromere and Kinetochore Function, in: *Centromeres and*  
718 *Kinetochores, Progress in Molecular and Subcellular Biology*. Springer, Cham, pp. 59–84.  
719 [https://doi.org/10.1007/978-3-319-58592-5\\_3](https://doi.org/10.1007/978-3-319-58592-5_3)
- 720 Frøkjær-Jensen, C., Davis, M.W., Sarov, M., Taylor, J., Flibotte, S., LaBella, M., Pozniakovsky, A.,  
721 Moerman, D.G., Jorgensen, E.M., 2014. Random and targeted transgene insertion in  
722 *Caenorhabditis elegans* using a modified *Mos1* transposon. *Nature Methods* 11, 529.  
723 <https://doi.org/10.1038/nmeth.2889>
- 724 Fujita, Y., Hayashi, T., Kiyomitsu, T., Toyoda, Y., Kokubu, A., Obuse, C., Yanagida, M., 2007. Priming of  
725 Centromere for CENP-A Recruitment by Human hMis18 $\alpha$ , hMis18 $\beta$ , and M18BP1.  
726 *Developmental Cell* 12, 17–30. <https://doi.org/10.1016/j.devcel.2006.11.002>

- 727 Gassmann, R., Rechtsteiner, A., Yuen, K.W., Muroyama, A., Egelhofer, T., Gaydos, L., Barron, F.,  
728 Maddox, P., Essex, A., Monen, J., Ercan, S., Lieb, J.D., Oegema, K., Strome, S., Desai, A., 2012.  
729 An inverse relationship to germline transcription defines centromeric chromatin in *C.*  
730 *elegans*. *Nature* 484, 534–537. <https://doi.org/10.1038/nature10973>
- 731 Gerlich, D., Hirota, T., Koch, B., Peters, J.-M., Ellenberg, J., 2006. Condensin I Stabilizes Chromosomes  
732 Mechanically through a Dynamic Interaction in Live Cells. *Current Biology* 16, 333–344.  
733 <https://doi.org/10.1016/j.cub.2005.12.040>
- 734 Gibcus, J.H., Samejima, K., Goloborodko, A., Samejima, I., Naumova, N., Nuebler, J., Kanemaki, M.T.,  
735 Xie, L., Paulson, J.R., Earnshaw, W.C., Mirny, L.A., Dekker, J., 2018. A pathway for mitotic  
736 chromosome formation. *Science* 359. <https://doi.org/10.1126/science.aao6135>
- 737 Green, L.C., Kalitsis, P., Chang, T.M., Cipetic, M., Kim, J.H., Marshall, O., Turnbull, L., Whitchurch, C.B.,  
738 Vagnarelli, P., Samejima, K., Earnshaw, W.C., Choo, K.H.A., Hudson, D.F., 2012. Contrasting  
739 roles of condensin I and condensin II in mitotic chromosome formation. *J Cell Sci* 125, 1591–  
740 1604. <https://doi.org/10.1242/jcs.097790>
- 741 Hagstrom, K.A., Holmes, V.F., Cozzarelli, N.R., Meyer, B.J., 2002. *C. elegans* condensin promotes  
742 mitotic chromosome architecture, centromere organization, and sister chromatid  
743 segregation during mitosis and meiosis. *Genes Dev* 16, 729–742.  
744 <https://doi.org/10.1101/gad.968302>
- 745 Harasymiw, L.A., Tank, D., McClellan, M., Panigrahy, N., Gardner, M.K., 2019. Centromere mechanical  
746 maturation during mammalian cell mitosis. *Nat Commun* 10, 1–21.  
747 <https://doi.org/10.1038/s41467-019-09578-z>
- 748 Hayashi, T., Fujita, Y., Iwasaki, O., Adachi, Y., Takahashi, K., Yanagida, M., 2004. Mis16 and Mis18 Are  
749 Required for CENP-A Loading and Histone Deacetylation at Centromeres. *Cell* 118, 715–729.  
750 <https://doi.org/10.1016/j.cell.2004.09.002>
- 751 Hirano, T., 2012. Condensins: universal organizers of chromosomes with diverse functions. *Genes*  
752 *Dev* 26, 1659–1678. <https://doi.org/10.1101/gad.194746.112>
- 753 Hirano, T., Mitchison, T.J., 1994. A heterodimeric coiled-coil protein required for mitotic chromosome  
754 condensation in vitro. *Cell* 79, 449–458. [https://doi.org/10.1016/0092-8674\(94\)90254-2](https://doi.org/10.1016/0092-8674(94)90254-2)
- 755 Hirota, T., Gerlich, D., Koch, B., Ellenberg, J., Peters, J.-M., 2004. Distinct functions of condensin I and  
756 II in mitotic chromosome assembly. *Journal of Cell Science* 117, 6435–6445.  
757 <https://doi.org/10.1242/jcs.01604>
- 758 Hori, T., Shang, W.-H., Hara, M., Ariyoshi, M., Arimura, Y., Fujita, R., Kurumizaka, H., Fukagawa, T.,  
759 2017. Association of M18BP1/KNL2 with CENP-A Nucleosome Is Essential for Centromere  
760 Formation in Non-mammalian Vertebrates. *Developmental Cell* 42, 181–189.e3.  
761 <https://doi.org/10.1016/j.devcel.2017.06.019>



- 762 Houlard, M., Godwin, J., Metson, J., Lee, J., Hirano, T., Nasmyth, K., 2015. Condensin confers the  
763 longitudinal rigidity of chromosomes. *Nature Cell Biology* 17, 771–781.  
764 <https://doi.org/10.1038/ncb3167>
- 765 Hudson, D.F., Vagnarelli, P., Gassmann, R., Earnshaw, W.C., 2003. Condensin Is Required for  
766 Nonhistone Protein Assembly and Structural Integrity of Vertebrate Mitotic Chromosomes.  
767 *Developmental Cell* 5, 323–336. [https://doi.org/10.1016/S1534-5807\(03\)00199-0](https://doi.org/10.1016/S1534-5807(03)00199-0)
- 768 Jansen, L.E.T., Black, B.E., Foltz, D.R., Cleveland, D.W., 2007. Propagation of centromeric chromatin  
769 requires exit from mitosis. *J Cell Biol* 176, 795–805. <https://doi.org/10.1083/jcb.200701066>
- 770 Kamath, R.S., Martinez-Campos, M., Zipperlen, P., Fraser, A.G., Ahringer, J., 2001. Effectiveness of  
771 specific RNA-mediated interference through ingested double-stranded RNA in  
772 *Caenorhabditis elegans*. *Genome Biol* 2, research0002.1-research0002.10.
- 773 Kruitwagen, T., Chymkowitch, P., Denoth-Lippuner, A., Enserink, J., Barral, Y., 2018. Centromeres  
774 License the Mitotic Condensation of Yeast Chromosome Arms. *Cell* 175, 780-795.e15.  
775 <https://doi.org/10.1016/j.cell.2018.09.012>
- 776 Lee, B.C.H., Lin, Z., Yuen, K.W.Y., 2016. RbAp46/48LIN-53 Is Required for Holocentromere Assembly  
777 in *Caenorhabditis elegans*. *Cell Reports* 14, 1819–1828.  
778 <https://doi.org/10.1016/j.celrep.2016.01.065>
- 779 Lin, Z., Yuen, K.W.Y., 2021. RbAp46/48LIN-53 and HAT-1 are required for initial CENP-AHCP-3  
780 deposition and de novo holocentromere formation on artificial chromosomes in  
781 *Caenorhabditis elegans* embryos. *Nucleic Acids Research*.  
782 <https://doi.org/10.1093/nar/gkab217>
- 783 Maddox, P.S., Hyndman, F., Monen, J., Oegema, K., Desai, A., 2007. Functional genomics identifies a  
784 Myb domain-containing protein family required for assembly of CENP-A chromatin. *The*  
785 *Journal of Cell Biology* 176, 757–763. <https://doi.org/10.1083/jcb.200701065>
- 786 Maddox, P.S., Portier, N., Desai, A., Oegema, K., 2006. Molecular analysis of mitotic chromosome  
787 condensation using a quantitative time-resolved fluorescence microscopy assay. *Proc Natl*  
788 *Acad Sci U S A* 103, 15097–15102. <https://doi.org/10.1073/pnas.0606993103>
- 789 McKinley, K.L., Cheeseman, I.M., 2016. The molecular basis for centromere identity and function. *Nat*  
790 *Rev Mol Cell Biol* 17, 16–29. <https://doi.org/10.1038/nrm.2015.5>
- 791 McKinley, K.L., Cheeseman, I.M., 2014. Polo-like Kinase 1 Licenses CENP-A Deposition at  
792 Centromeres. *Cell* 158, 397–411. <https://doi.org/10.1016/j.cell.2014.06.016>
- 793 Monen, J., Maddox, P.S., Hyndman, F., Oegema, K., Desai, A., 2005. Differential role of CENP-A in the  
794 segregation of holocentric *C. elegans* chromosomes during meiosis and mitosis. *Nat Cell Biol*  
795 7, 1248–1255. <https://doi.org/10.1038/ncb1331>
- 796 Moree, B., Meyer, C.B., Fuller, C.J., Straight, A.F., 2011. CENP-C recruits M18BP1 to centromeres to

- 797 promote CENP-A chromatin assembly. *Journal of Cell Biology* 194, 855–871.  
798 <https://doi.org/10.1083/jcb.201106079>
- 799 Navarro, A.P., Cheeseman, I.M., 2021. Kinetochore assembly throughout the cell cycle. *Seminars in*  
800 *Cell & Developmental Biology*. <https://doi.org/10.1016/j.semcd.2021.03.008>
- 801 Oegema, K., Desai, A., Rybina, S., Kirkham, M., Hyman, A.A., 2001. Functional Analysis of Kinetochore  
802 Assembly in *Caenorhabditis elegans*. *J Cell Biol* 153, 1209–1226.  
803 <https://dx.doi.org/10.1083/jcb.153.6.1209>
- 804 Ogle, D.H., Wheeler, P., Dinno, A., 2021. FSA: Fisheries Stock Analysis.  
805 <https://github.com/droglenc/FSA>
- 806 Oliveira, R.A., Coelho, P.A., Sunkel, C.E., 2005. The Condensin I Subunit Barren/CAP-H Is Essential for  
807 the Structural Integrity of Centromeric Heterochromatin during Mitosis. *Molecular and*  
808 *Cellular Biology* 25, 8971–8984. <https://doi.org/10.1128/MCB.25.20.8971-8984.2005>
- 809 Ono, T., Fang, Y., Spector, D.L., Hirano, T., 2004. Spatial and Temporal Regulation of Condensins I and  
810 II in Mitotic Chromosome Assembly in Human Cells. *MBoC* 15, 3296–3308.  
811 <https://doi.org/10.1091/mbc.e04-03-0242>
- 812 Ono, T., Losada, A., Hirano, M., Myers, M.P., Neuwald, A.F., Hirano, T., 2003. Differential  
813 Contributions of Condensin I and Condensin II to Mitotic Chromosome Architecture in  
814 Vertebrate Cells. *Cell* 115, 109–121. [https://doi.org/10.1016/S0092-8674\(03\)00724-4](https://doi.org/10.1016/S0092-8674(03)00724-4)
- 815 Ono, T., Sakamoto, C., Nakao, M., Saitoh, N., Hirano, T., 2017. Condensin II plays an essential role in  
816 reversible assembly of mitotic chromosomes in situ. *MBoC* 28, 2875–2886.  
817 <https://doi.org/10.1091/mbc.e17-04-0252>
- 818 Pan, D., Klare, K., Petrovic, A., Take, A., Walstein, K., Singh, P., Rondelet, A., Bird, A.W., Musacchio, A.,  
819 2017. CDK-regulated dimerization of M18BP1 on a Mis18 hexamer is necessary for CENP-A  
820 loading. *eLife* 6. <https://doi.org/10.7554/eLife.23352>
- 821 Pan, D., Walstein, K., Take, A., Bier, D., Kaiser, N., Musacchio, A., 2019. Mechanism of centromere  
822 recruitment of the CENP-A chaperone HJURP and its implications for centromere licensing.  
823 *Nat Commun* 10, 4046. <https://doi.org/10.1038/s41467-019-12019-6>
- 824 Pereira, C., Reis, R.M., Gama, J.B., Celestino, R., Cheerambathur, D.K., Carvalho, A.X., Gassmann, R.,  
825 2018. Self-Assembly of the RZZ Complex into Filaments Drives Kinetochore Expansion in the  
826 Absence of Microtubule Attachment. *Current Biology* 28, 3408–3421.e8.  
827 <https://doi.org/10.1016/j.cub.2018.08.056>
- 828 Pollard, D.A., Pollard, T.D., Pollard, K.S., 2019. Empowering statistical methods for cellular and  
829 molecular biologists. *MBoC* 30, 1359–1368. <https://doi.org/10.1091/mbc.E15-02-0076>
- 830 Prosée, R.F., Wenda, J.M., Gabus, C., Delaney, K., Schwager, F., Gotta, M., Steiner, F.A., 2020. Trans-  
831 generational inheritance of centromere identity requires the CENP-A N-terminal tail in the C.

- 832 *C. elegans* maternal germ line. bioRxiv 2020.10.05.325985.  
833 <https://doi.org/10.1101/2020.10.05.325985>
- 834 Samoshkin, A., Arnaoutov, A., Jansen, L.E.T., Ouspenski, I., Dye, L., Karpova, T., McNally, J., Dasso, M.,  
835 Cleveland, D.W., Strunnikov, A., 2009. Human Condensin Function Is Essential for  
836 Centromeric Chromatin Assembly and Proper Sister Kinetochores Orientation. PLoS ONE 4,  
837 e6831. <https://doi.org/10.1371/journal.pone.0006831>
- 838 Sarov, M., Murray, J.I., Schanze, K., Pozniakovski, A., Niu, W., Angermann, K., Hasse, S., Rupprecht,  
839 M., Vinis, E., Tinney, M., Preston, E., Zinke, A., Enst, S., Teichgraber, T., Janette, J., Reis, K.,  
840 Janosch, S., Schloissnig, S., Ejsmont, R.K., Slightam, C., Xu, X., Kim, S.K., Reinke, V., Stewart,  
841 A.F., Snyder, M., Waterston, R.H., Hyman, A.A., 2012. A Genome-Scale Resource for In Vivo  
842 Tag-Based Protein Function Exploration in *C. elegans*. Cell 150, 855–866.  
843 <https://doi.org/10.1016/j.cell.2012.08.001>
- 844 Savvidou, E., Cobbe, N., Steffensen, S., Cotterill, S., Heck, M.M.S., 2005. Drosophila CAP-D2 is  
845 required for condensin complex stability and resolution of sister chromatids. Journal of Cell  
846 Science 118, 2529–2543. <https://doi.org/10.1242/jcs.02392>
- 847 Schindelin, J., Arganda-Carreras, I., Frise, E., Kaynig, V., Longair, M., Pietzsch, T., Preibisch, S., Rueden,  
848 C., Saalfeld, S., Schmid, B., Tinevez, J.-Y., White, D.J., Hartenstein, V., Eliceiri, K., Tomancak,  
849 P., Cardona, A., 2012. Fiji: an open-source platform for biological-image analysis. Nat.  
850 Methods 9, 676–682. <https://doi.org/10.1038/nmeth.2019>
- 851 Shintomi, K., Hirano, T., 2011. The relative ratio of condensin I to II determines chromosome shapes.  
852 Genes Dev. 25, 1464–1469. <https://doi.org/10.1101/gad.2060311>
- 853 Silva, M.C.C., Bodor, D.L., Stellfox, M.E., Martins, N.M.C., Hochegeger, H., Foltz, D.R., Jansen, L.E.T.,  
854 2012. Cdk Activity Couples Epigenetic Centromere Inheritance to Cell Cycle Progression.  
855 Developmental Cell 22, 52–63. <https://doi.org/10.1016/j.devcel.2011.10.014>
- 856 Sonnevile, R., Craig, G., Labib, K., Gartner, A., Blow, J.J., 2015. Both Chromosome Decondensation  
857 and Condensation Are Dependent on DNA Replication in *C. elegans* Embryos. Cell Reports 12,  
858 405–417. <https://doi.org/10.1016/j.celrep.2015.06.046>
- 859 Spiller, F., Medina-Pritchard, B., Abad, M.A., Wear, M.A., Molina, O., Earnshaw, W.C., Jeyapakash,  
860 A.A., 2017. Molecular basis for Cdk1-regulated timing of Mis18 complex assembly and CENP-  
861 A deposition. EMBO reports 18, 894–905. <https://doi.org/10.15252/embr.201643564>
- 862 Stankovic, A., Guo, L.Y., Mata, J.F., Bodor, D.L., Cao, X.-J., Bailey, A.O., Shabanowitz, J., Hunt, D.F.,  
863 Garcia, B.A., Black, B.E., Jansen, L.E.T., 2017. A Dual Inhibitory Mechanism Sufficient to  
864 Maintain Cell-Cycle-Restricted CENP-A Assembly. Molecular Cell 65, 231–246.  
865 <https://doi.org/10.1016/j.molcel.2016.11.021>
- 866 Stear, J.H., Roth, M.B., 2002. Characterization of HCP-6, a *C. elegans* protein required to prevent

867 chromosome twisting and merotelic attachment. *Genes Dev* 16, 1498–1508.  
868 <https://doi.org/10.1101/gad.989102>

869 Steffensen, S., Coelho, P.A., Cobbe, N., Vass, S., Costa, M., Hassan, B., Prokopenko, S.N., Bellen, H.,  
870 Heck, M.M.S., Sunkel, C.E., 2001. A role for *Drosophila* SMC4 in the resolution of sister  
871 chromatids in mitosis. *Current Biology* 11, 295–307. [https://doi.org/10.1016/S0960-](https://doi.org/10.1016/S0960-9822(01)00096-3)  
872 [9822\(01\)00096-3](https://doi.org/10.1016/S0960-9822(01)00096-3)

873 Steiner, F.A., Henikoff, S., 2015. Diversity in the organization of centromeric chromatin. *Curr. Opin.*  
874 *Genet. Dev.* 31, 28–35. <https://doi.org/10.1016/j.gde.2015.03.010>

875 Wickham, H., 2011. The Split-Apply-Combine Strategy for Data Analysis. *Journal of Statistical*  
876 *Software* 40, 1–29. <https://doi.org/10.18637/jss.v040.i01>

877 Wickham, H., 2009. *ggplot2: Elegant Graphics for Data Analysis, Use R!* Springer-Verlag, New York.  
878 <https://doi.org/10.1007/978-0-387-98141-3>

879 Yong-Gonzalez, V., Wang, B.-D., Butylin, P., Ouspenski, I., Strunnikov, A., 2007. Condensin function at  
880 centromere chromatin facilitates proper kinetochore tension and ensures correct mitotic  
881 segregation of sister chromatids. *Genes to Cells* 12, 1075–1090.  
882 <https://doi.org/10.1111/j.1365-2443.2007.01109.x>

883 Yu, H.-G., Koshland, D.E., 2003. Meiotic condensin is required for proper chromosome compaction,  
884 SC assembly, and resolution of recombination-dependent chromosome linkages. *Journal of*  
885 *Cell Biology* 163, 937–947. <https://doi.org/10.1083/jcb.200308027>

886

887

888

889

## FIGURE 1

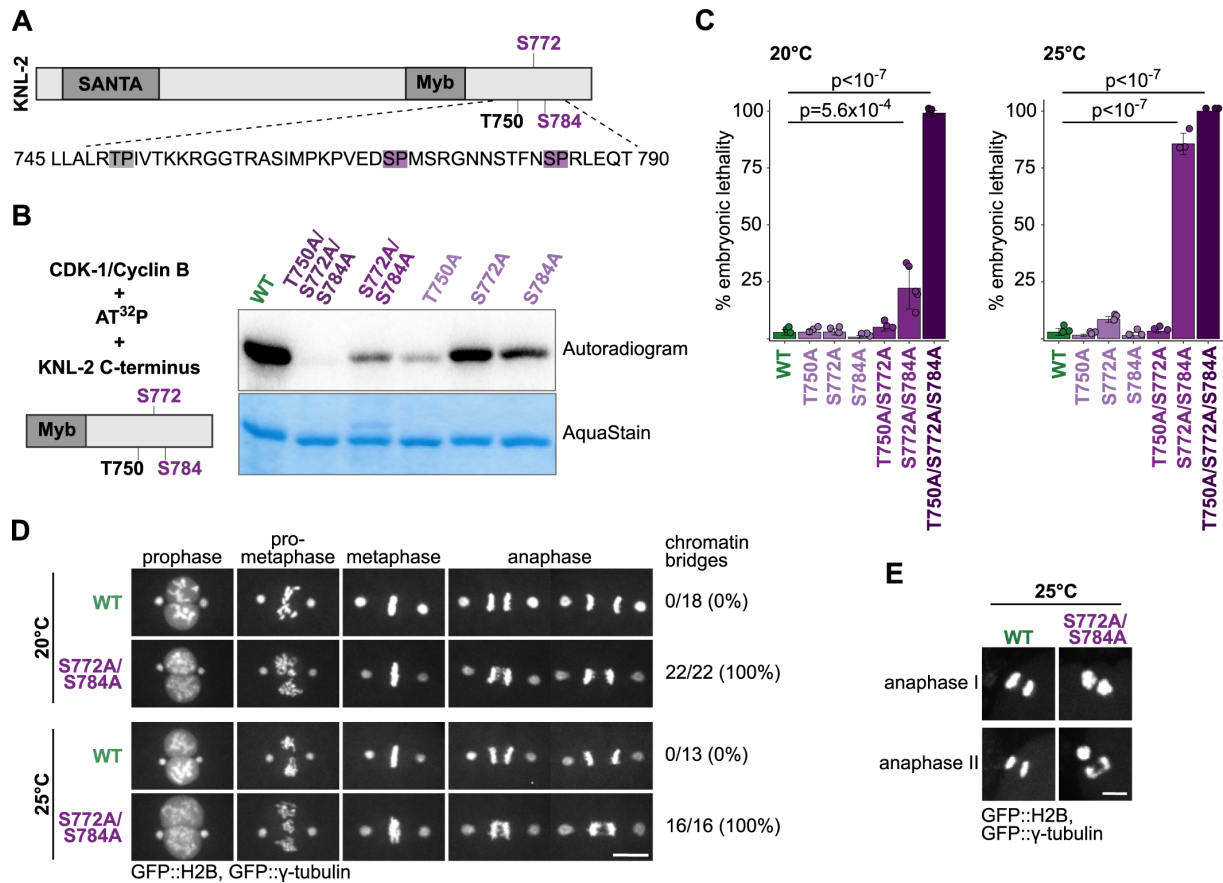

890

891 **Figure 1. The C-terminal part of KNL-2 is phosphorylated by CDK-1.** (A) Top, scheme of KNL-2 with  
 892 annotated domains and phosphosites analysed in this study. Bottom, amino acid sequence  
 893 containing the three phosphosites with CDK-1 consensus sequence. Two phosphosites identified by  
 894 the IP-MS analysis are marked in violet, a third site with a CDK-1 consensus sequence is marked in  
 895 grey. (B) *In vitro* CDK-1 kinase assay for recombinant C-terminal fragments of KNL-2, with the  
 896 phosphosites mutated to alanines individually or in combination with each other. Left, scheme of the  
 897 reagents used. Right, autoradiogram and AquaStain staining of the purified KNL-2 fragments. (C)  
 898 Quantification of embryonic lethality for wild type (WT) and different KNL-2 phosphosite mutants at  
 899 20°C or 25°C. Data points indicate the average value for each biological replicate of the experiment  
 900 (8-10 hermaphrodites used and a total of over 100 embryos were scored per replicate). For statistical  
 901 analysis ANOVA followed by Tukey-Kramer post hoc was used. Relevant p-values are indicated, all  
 902 other comparisons to WT are not significant. Error bars indicate s.d. (D-E) Snapshots from live cell  
 903 imaging of WT and S772A/S784A one-cell embryos expressing GFP::H2B and GFP::γ-tubulin. Images  
 904 show selected stages of cell division in mitosis (D) or meiosis (E). Percentages of embryos displaying a  
 905 bridging phenotype in the first mitotic division are indicated. Scale bars: 10 μm (D) or 5 μm (E).

906

## FIGURE 2

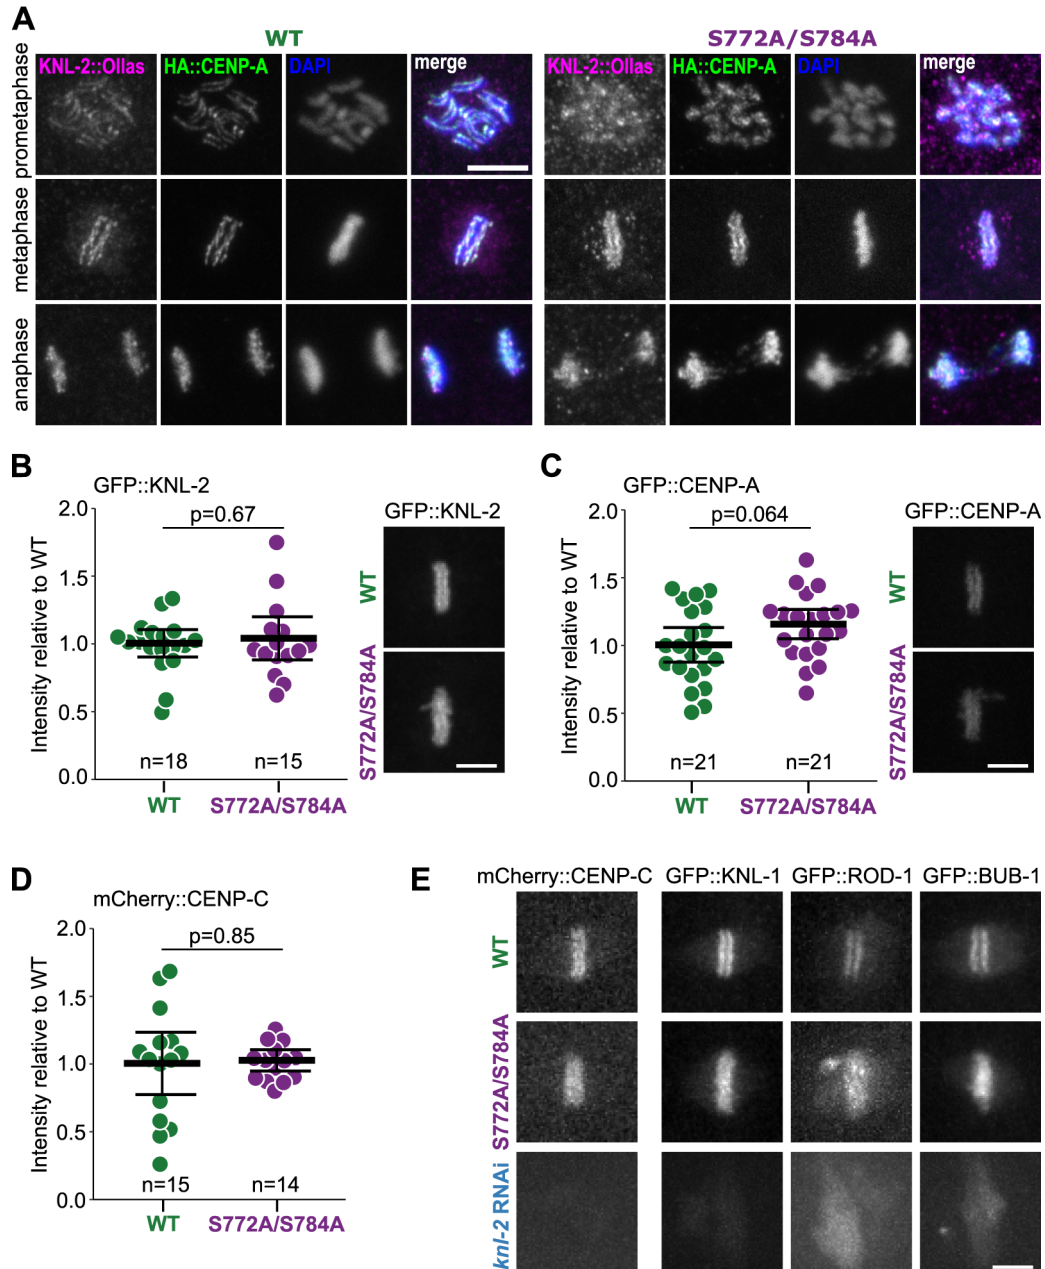

907

908 **Figure 2. S772A and S784A mutations do not affect KNL-2 localisation, stability, and functions in**  
 909 **centromere maintenance and kinetochore recruitment.** (A) Immunofluorescent staining of young  
 910 wild type (WT) and S772A/S784A embryos expressing KNL-2::Ollas and HA::CENP-A at different  
 911 stages of mitosis. (B-C) Quantification of GFP::KNL-2 (B) or GFP::CENP-A (C) signal on first embryonic  
 912 metaphases of WT and S772A/S784A strains. Each data point represents one scored embryo.  
 913 Representative images are shown on the right. (D) Quantification of mCherry::CENP-C signal on first  
 914 embryonic metaphases of WT and S772A/S784A strains. Each data point represents one scored  
 915 embryo. Statistical significance was assessed with a t-test (B-D). (E) Representative snapshots from  
 916 live cell imaging of embryos expressing the mCherry::CENP-C and GFP-tagged kinetochore proteins  
 917 KNL-1, ROD-1 and BUB-1. Scale bar in all images: 5  $\mu$ m. In all graphs bars represent mean  $\pm$  95% c.i.

### FIGURE 3

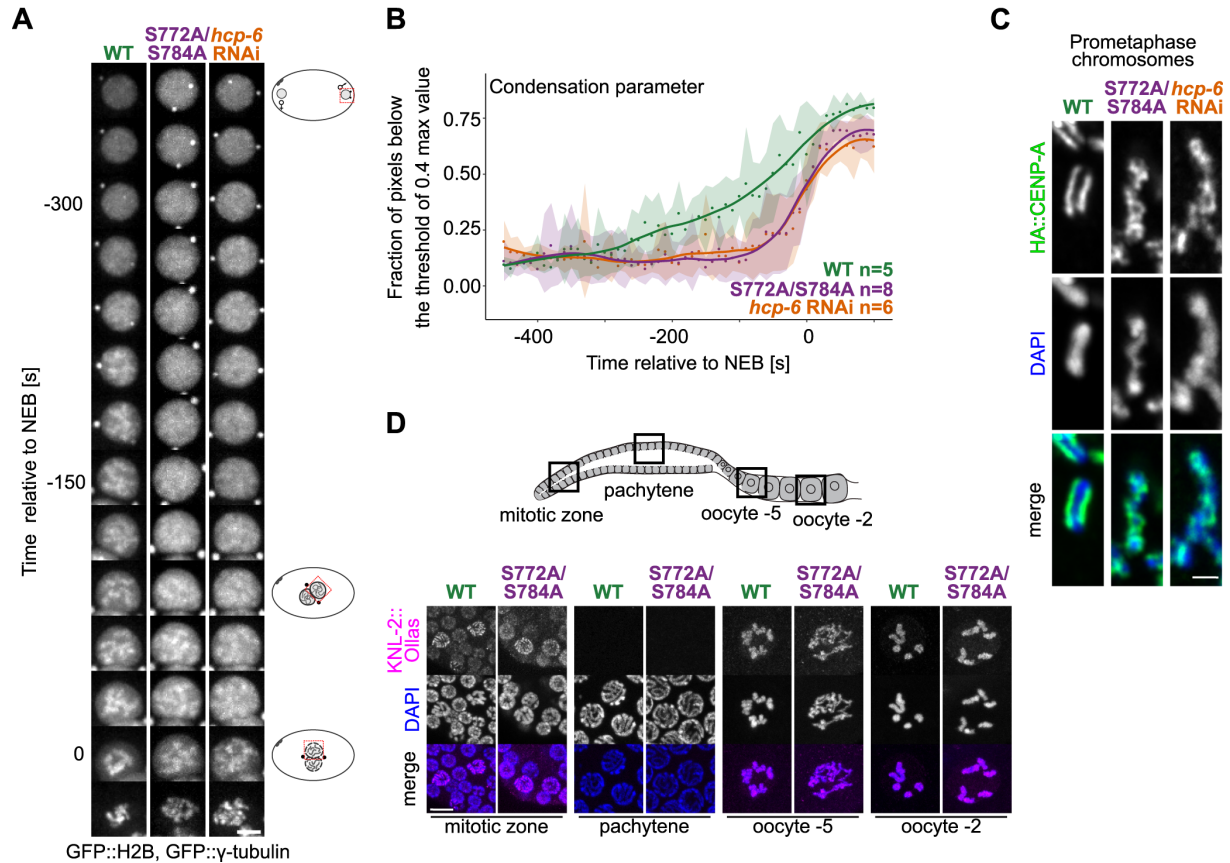

918

919 **Figure 3. Chromosome condensation is impaired in the S772A/S784A mutant.** (A) Kymographs of  
 920 male pronuclei in embryos expressing GFP::H2B and GFP::γ-tubulin, illustrating the progression of  
 921 chromosome condensation over time. NEB - nuclear envelope breakdown. Wild type (WT),  
 922 S772A/S784A, and *hcp-6* RNAi-depletion strains were imaged. Scale bar: 5 μm. (B) Quantification of  
 923 the condensation parameter in time, for strains as in (A). The condensation parameter is defined as  
 924 the fraction of pixels with values below an arbitrarily chosen threshold of 0.4 of the maximum pixel  
 925 value for each image (i. e. timepoint). Dots indicate the average value of the condensation parameter  
 926 for each timepoint, s.d. is represented as a shaded area. To better illustrate the trend of the  
 927 condensation parameter changes in time, line plots were fitted with R loess function (span=0.4). n  
 928 corresponds to the number of embryos scored per condition. (C) Immunofluorescent staining of  
 929 HA::CENP-A on mitotic prometaphase chromosomes, counterstained with DAPI, in strains as in (A).  
 930 Each image shows a single chromosome from a prometaphase embryonic cell. Pictures were  
 931 deconvoluted with the Leica Lightning procedure. Scale bar: 1 μm. (D) *C. elegans* germ line scheme  
 932 (top), with boxes indicating the location of the nuclei imaged. Immunofluorescence of KNL-2::Ollas in  
 933 WT and S772A/S784A germ cells, counterstained with DAPI (bottom). Scale bar: 5 μm.

934

## FIGURE 4

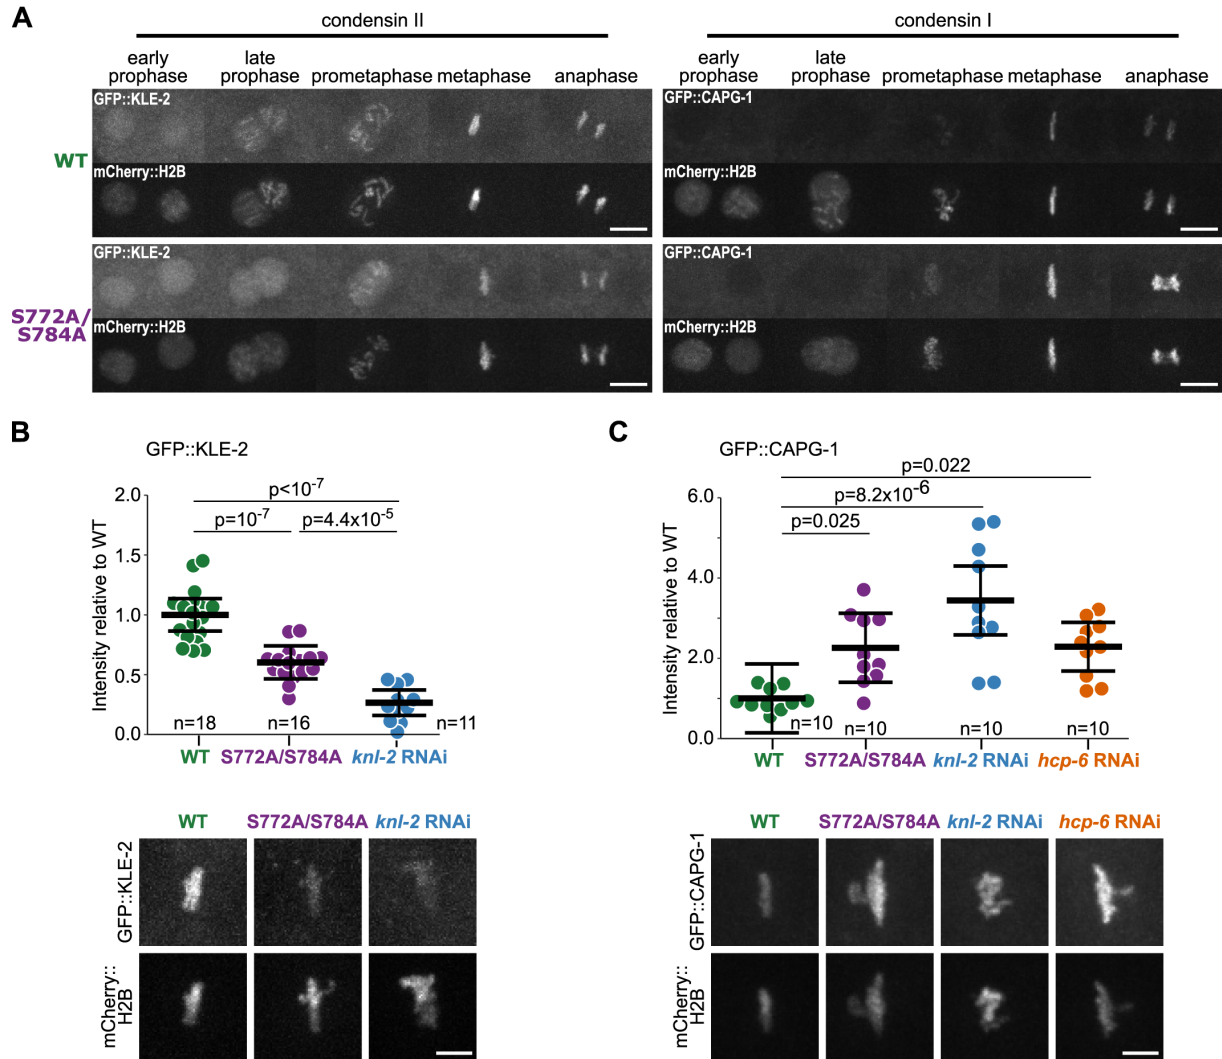

935

936 **Figure 4. Condensin complex levels on chromatin are changed in the S772A/S784A mutant.** (A)

937 Images of selected stages of first embryonic mitosis in wild type (WT) and S772A/S784A strains

938 expressing GFP::KLE-2 (condensin complex II) or GFP::CAPG-1 (condensin complex I) and

939 mCherry::H2B. Scale bar: 10  $\mu$ m (B-C) Quantification of GFP::KLE-2 (B) and GFP::CAPG-1 (C) signal on

940 first embryonic metaphases, in indicated strains. Each data point represents one scored embryo.

941 Representative images are shown below the quantifications. Scale bar: 5  $\mu$ m. For assessing statistical

942 significance ANOVA followed by the Tukey-Kramer test was used. In all graphs bars represent mean  $\pm$

943 95% c.i.

944



## FIGURE S1

**A**

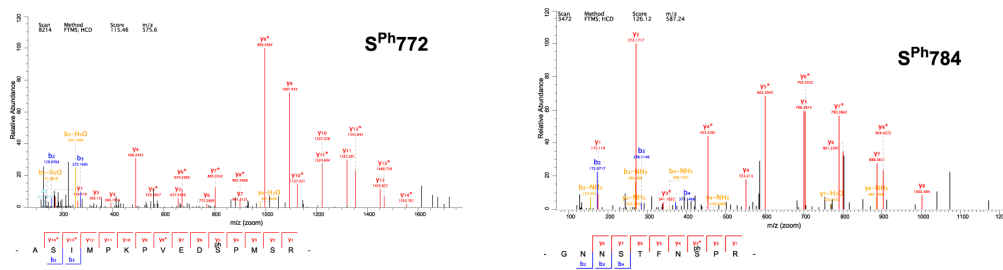

**B**

|                      |                              |      |     |      |      |       |      |      |      |    |    |     |     |    |     |      |     |         |       |      |     |      |      |     |     |     |   |   |   |   |   |   |   |   |   |   |   |   |     |   |   |   |   |      |
|----------------------|------------------------------|------|-----|------|------|-------|------|------|------|----|----|-----|-----|----|-----|------|-----|---------|-------|------|-----|------|------|-----|-----|-----|---|---|---|---|---|---|---|---|---|---|---|---|-----|---|---|---|---|------|
| <i>C. elegans</i>    | KNL-2                        | 740  | AAD | SLLA | MP   | V     | VKK  | GGTR | S    | MP | MP | --- | VE  | SP | --- | MSR  | --- | GNNSTF  | ---   | SPRL | QTK | KD   | 794  |     |     |     |   |   |   |   |   |   |   |   |   |   |   |   |     |   |   |   |   |      |
| <i>C. angaria</i>    | Cang_2012_03_13_00461.g11129 | 612  | SAD | SLLA | MP   | V     | VRR  | GGTR | S    | MP | MP | --- | VD  | SP | --- | TR   | --- | SINSSVD | ---   | TPKP | AT  | KD   | 669  |     |     |     |   |   |   |   |   |   |   |   |   |   |   |   |     |   |   |   |   |      |
| <i>C. japonica</i>   | Cjp-KNL-2                    | 645  | SAD | SLLA | MP   | C     | AKK  | GGTR | S    | MP | MP | --- | VD  | SP | --- | VLR  | --- | LN      | ---   | CSYA | --- | SPKL | VTK  | CKE | 700 |     |   |   |   |   |   |   |   |   |   |   |   |   |     |   |   |   |   |      |
| <i>C. inopinata</i>  | Sp34_10328100                | 732  | AAD | SLLA | MP   | T     | VVRR | GGTR | S    | MP | MP | --- | VD  | SP | --- | LAR  | --- | GNSAL   | ---   | K    | --- | SPKL | QTK  | KE  | 786 |     |   |   |   |   |   |   |   |   |   |   |   |   |     |   |   |   |   |      |
| <i>C. inopinata</i>  | Sp34_10323000                | 697  | --- | D    | SLLA | MP    | T    | VVRR | GGTR | S  | MP | MP  | --- | VD | SP  | ---  | LAR | ---     | GNSAL | ---  | K   | ---  | SPKL | QTK | KE  | 749 |   |   |   |   |   |   |   |   |   |   |   |   |     |   |   |   |   |      |
| <i>C. remanei</i>    | Cre-KNL-2                    | 782  | AAD | SLLA | MP   | V     | VKK  | GGTR | S    | MP | MP | --- | VD  | SP | --- | IVR  | --- | GSRNNTL | ---   | SPRL | QTK | KE   | 838  |     |     |     |   |   |   |   |   |   |   |   |   |   |   |   |     |   |   |   |   |      |
| <i>C. latens</i>     | FL83_16143                   | 695  | AAD | SLLA | MP   | V     | VKK  | GGTR | S    | MP | MP | --- | VD  | SP | --- | IVR  | --- | GSRNNTL | ---   | SPRL | QTK | KE   | 751  |     |     |     |   |   |   |   |   |   |   |   |   |   |   |   |     |   |   |   |   |      |
| <i>C. tropicalis</i> | Csp11.Scaffold630.g20341     | 743  | AAD | SLLA | MP   | V     | VAKK | GGTR | S    | MP | MP | --- | VD  | SP | --- | IAR  | --- | GKNSSF  | ---   | SPRL | QTK | KE   | 797  |     |     |     |   |   |   |   |   |   |   |   |   |   |   |   |     |   |   |   |   |      |
| <i>C. briggsae</i>   | Cbr-KNL-2                    | 751  | AAD | SLLA | MP   | V     | AKK  | GGTR | S    | MP | MP | --- | VD  | SP | --- | LVR  | --- | RNNTL   | ---   | SPRL | QTK | KE   | 805  |     |     |     |   |   |   |   |   |   |   |   |   |   |   |   |     |   |   |   |   |      |
| <i>C. nigoni</i>     | Cni-KNL-2                    | 859  | AAD | SLLA | MP   | V     | VAKK | GGTR | S    | MP | MP | --- | VD  | SP | --- | LVR  | --- | RNNTL   | ---   | SPRL | QTK | KE   | 913  |     |     |     |   |   |   |   |   |   |   |   |   |   |   |   |     |   |   |   |   |      |
| <i>C. sinica</i>     | Csp5_scaffold_02300.g25872   | 759  | AAD | SLLA | MP   | V     | VKK  | GGTR | S    | MP | MP | --- | VD  | SP | --- | VVRG | --- | GNNSTF  | ---   | SPRL | QTK | KE   | 814  |     |     |     |   |   |   |   |   |   |   |   |   |   |   |   |     |   |   |   |   |      |
| <i>C. brenneri</i>   | Cbn-KNL-2.1                  | 235  | AAD | SLLA | MP   | V     | VAKK | GGTR | S    | MP | MP | --- | VD  | SP | --- | IVR  | --- | GRNSTF  | ---   | SPRL | QTK | KE   | 289  |     |     |     |   |   |   |   |   |   |   |   |   |   |   |   |     |   |   |   |   |      |
| <i>P. pacificus</i>  | Ppa-KNL-2                    | 1259 | DPD | SLLA | DD   | DDVAP | P    | Q    | TTKT | K  | M  | A   | A   | A  | A   | T    | P   | R       | L     | A    | L   | S    | S    | --- | SP  | SGS | A | M | I | S | A | R | S | S | A | K | F | V | --- | W | N | D | T | 1333 |

**C**

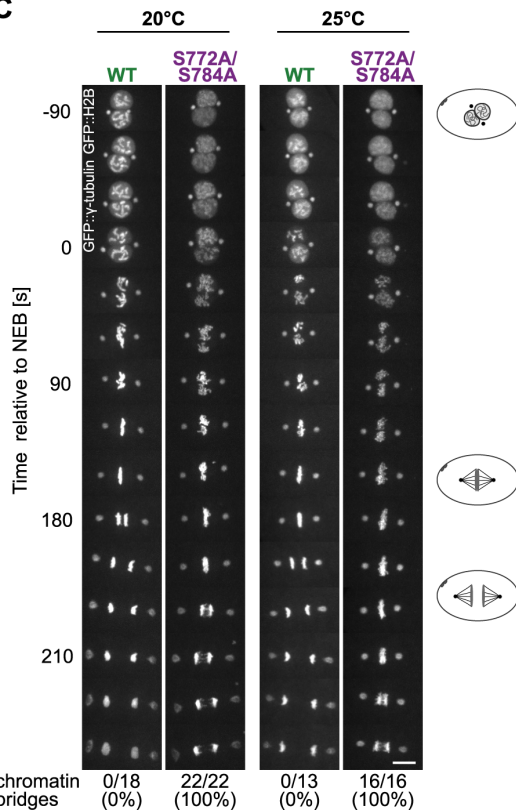

945 chromatin bridges 0/18 (0%) 22/22 (100%) 0/13 (0%) 16/16 (100%)

**D**

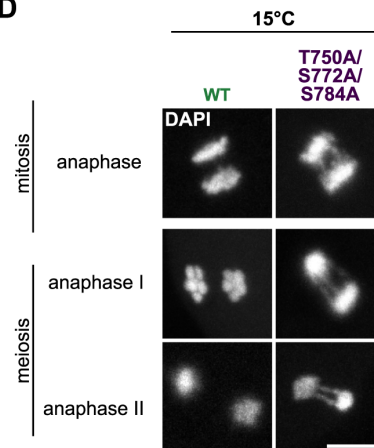

946 **Figure S1. KNL-2 is phosphorylated on conserved residues T750, S772 and S784.** (A) Exemplary  
 947 spectra for peptides harbouring S772Ph or S784Ph modification identified by mass spectrometry. (B)  
 948 Alignment of the C-terminal part of KNL-2 proteins from *Caenorhabditis* species, with KNL-2 from  
 949 *Pristionchus pacificus* as an outgroup. The phosphosites identified in this study are marked with red  
 950 boxes. (C) Kymographs illustrating the first embryonic division at 20°C and 25°C for wildtype (WT)  
 951 and S772A/S784A embryos expressing GFP::H2B and GFP::γ-tubulin, with percentages of embryos  
 952 exhibiting chromatin bridges during anaphase. NEB - nuclear envelope breakdown. Scale bar: 10 μm.

953 (D) DAPI staining of fixed embryos from WT and T750A/S772A/S784A strains. Images show  
954 anaphases of mitotic and meiotic divisions at 15°C (permissive temperature for this strain). Scale bar:  
955 5  $\mu$ m.

956

## FIGURE S2

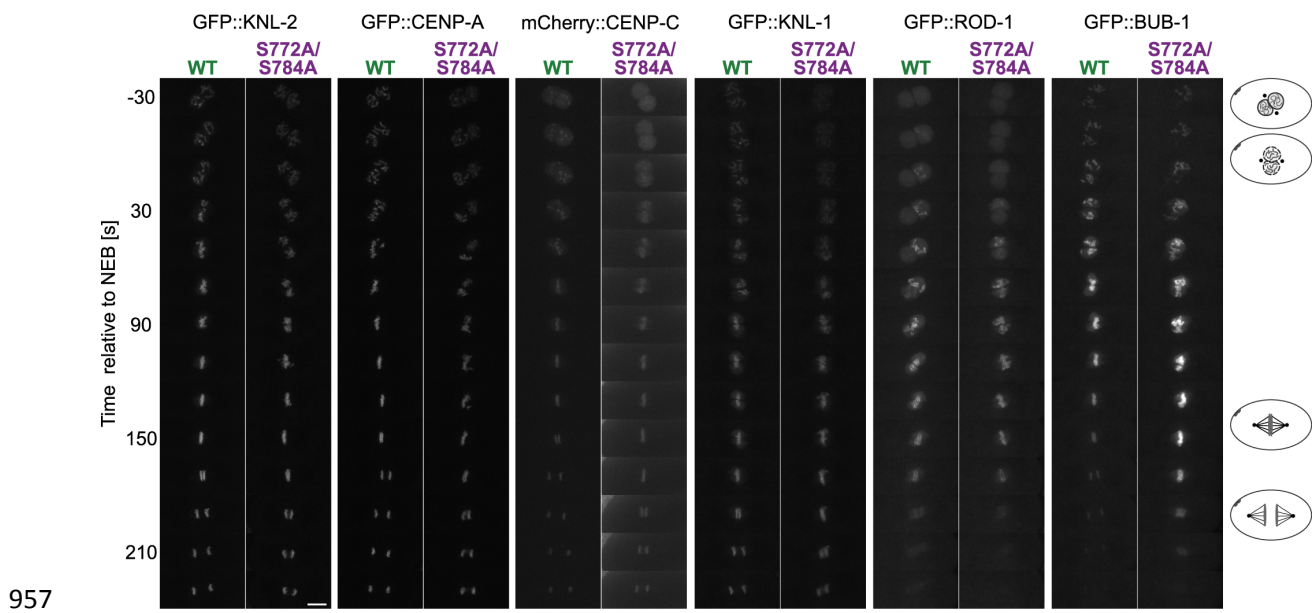

958 **Figure S2. Localisation of centromeric and kinetochore proteins is not affected by S772A and S784A**  
959 **KNL-2 mutations.** Kymographs showing the first embryonic division for wildtype (WT) and  
960 S772A/S784A embryos expressing the indicated GFP- or mCherry-tagged centromere and  
961 kinetochore proteins. NEB - nuclear envelope breakdown. Scale bar: 10  $\mu$ m.

962

## FIGURE S3

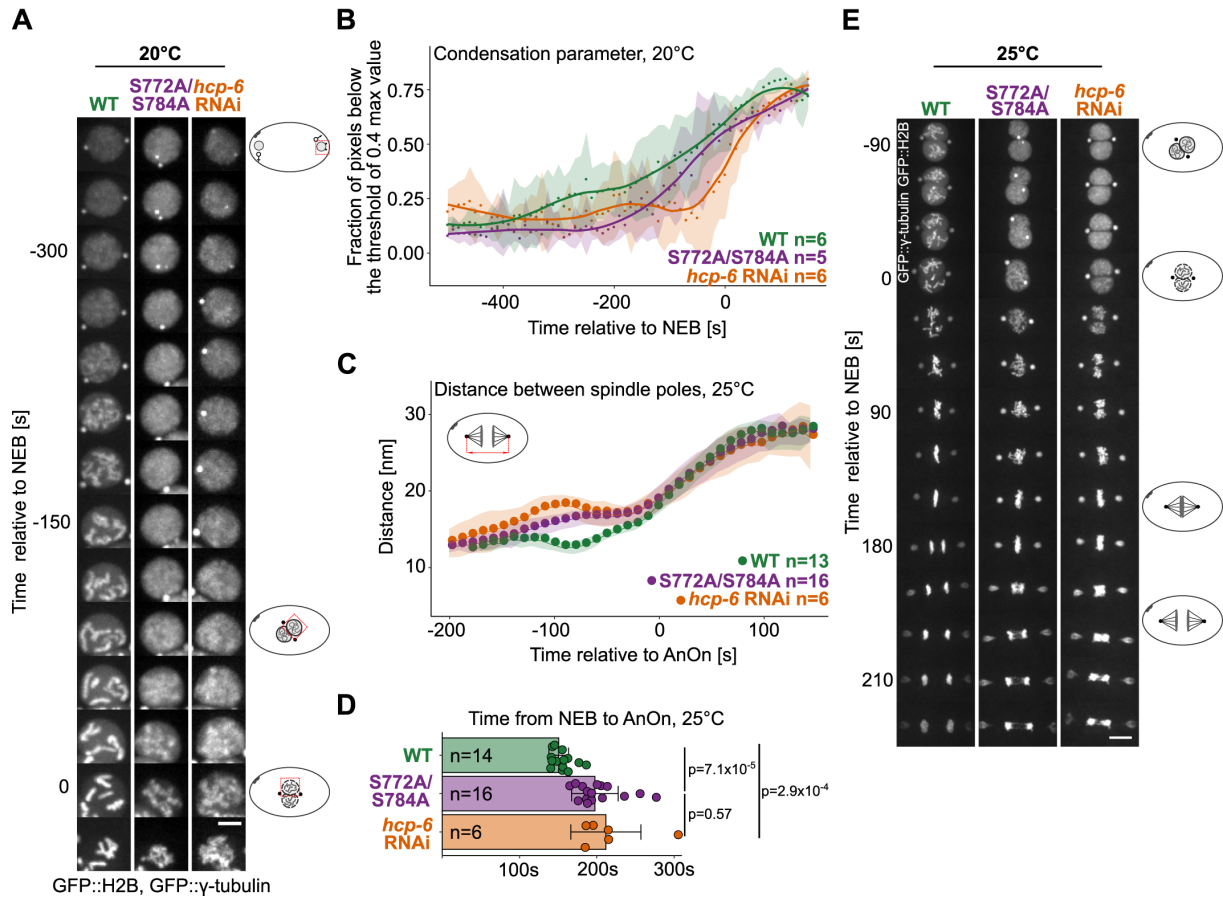

963

964 **Figure S3. Condensation impairment and resulting phenotypes in the S772A/S784A strain.** Wild  
965 type (WT), S772A/S784A and *hcp-6* RNAi strains expressing GFP::H2B and GFP:: $\gamma$ -tubulin were  
966 analysed. (A) Kymographs of male pronuclei, illustrating the progression of chromosome  
967 condensation over time at 20°C (permissive temperature). Scale bar: 5  $\mu$ m. (B) Quantification of the  
968 condensation parameter at 20°C (fraction of pixels with values below the arbitrarily chosen threshold  
969 of 0.4 of the maximum pixel value) for the time series in (A). Dots show the mean value of the  
970 condensation parameter for each timepoint, shaded areas represent s.d. Line plots were fitted with  
971 the R loess function (span=0.4) for illustrating the trend. n corresponds to the number of embryos  
972 scored per condition. (C) Kymographs comparing the first embryonic division. NEB - nuclear envelope  
973 breakdown. Scale bar: 10  $\mu$ m. (D) Graph illustrating the changes of the distance between spindle  
974 poles in time. Dots show the average distance for each timepoint, shaded areas represent s.d., n  
975 denotes the number of scored embryos. AnOn - anaphase onset. (E) Quantification of the time  
976 between NEB and AnOn. Dots correspond to individual embryos scored (the total number n is  
977 indicated), error bars depict s.d. Statistical significance was assessed with Kruskal-Wallis test followed  
978 by Dunn's post hoc with Benjamini-Hochberg p-value adjustment.

979

## FIGURE S4

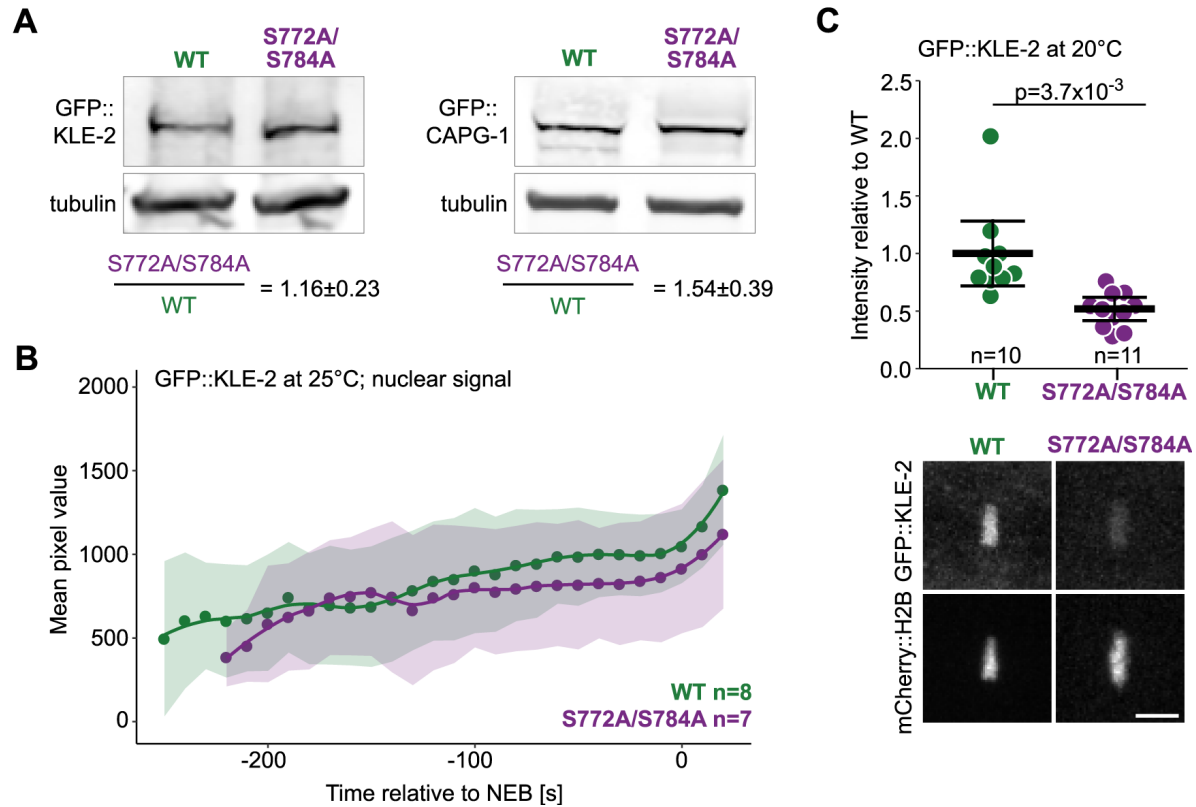

980

981 **Figure S4. Condensin complexes in the S772A/S784A mutant.** (A) Western blot of total embryonic  
982 lysates from wild type or S772A/S784A strains. An antibody against GFP was used for detecting  
983 GFP::KLE-2 or GFP::CAPG-1, tubulin was used as a loading control. GFP band intensities were  
984 normalised to tubulin band intensities, and condensin subunit abundance in the S772A/S784A strain  
985 was compared to wildtype (average and s.d. from three experiments). (B) Quantification of the  
986 nuclear GFP::KLE-2 abundance in one cell embryos of wildtype and S772A/S784A strains. The line  
987 plot represents average value for all measurements, shaded areas represent s.d., n corresponds to  
988 the number of scored embryos per condition. (C) Quantification of GFP::KLE-2 signal on first  
989 embryonic metaphase plates at 20°C (permissive temperature). Each data point represents one  
990 scored embryo. t-test was used for testing the statistical significance. Representative images are  
991 shown below the quantifications. Scale bar: 5  $\mu$ m.

992

993 **SUPPLEMENTARY TABLES**

994 **Table S1. Phosphopeptides identified in this study**

| Peptides                                                                                                                                   | Modified residue no. | PSM                                                                                | PEP             | Localisation probability | Identified          | Not phosphorylated peptide identified |
|--------------------------------------------------------------------------------------------------------------------------------------------|----------------------|------------------------------------------------------------------------------------|-----------------|--------------------------|---------------------|---------------------------------------|
| ASIMPKPVEDSP<br>MSR                                                                                                                        | 772                  | 5                                                                                  | 0.00016266<br>4 | 0.995874                 | in 2<br>experiments | Yes                                   |
| GNNSTFNSPR                                                                                                                                 | 784                  | 2                                                                                  | 0.00024502<br>5 | 0.999924                 | in 2<br>experiments | Yes                                   |
| <i>TPIVTK</i>                                                                                                                              | <i>750</i>           | <i>not identified in IP-MS experiments; T750 phosphorylated in in vitro assays</i> |                 |                          |                     |                                       |
| Searches performed with MaxQuant (Version 1.6.0.16)                                                                                        |                      |                                                                                    |                 |                          |                     |                                       |
| PSM - Peptide Spectrum Match; PEP - Posterior Error Probability; Localisation probability - denotes how likely a given residue is modified |                      |                                                                                    |                 |                          |                     |                                       |

995

996 **Table S2. List of strains used in this study**

| Name   | Genotype                                                                                                               | Source                  | Comment                                                                                                              |
|--------|------------------------------------------------------------------------------------------------------------------------|-------------------------|----------------------------------------------------------------------------------------------------------------------|
| N2     | Wild type strain                                                                                                       | CGC                     | used as parental strain for strain construction                                                                      |
| EG6699 | <i>ttT15605 II; unc-119(ed3) III</i>                                                                                   | CGC                     | used as parental strain for strain construction                                                                      |
| TH32   | <i>ruls32 [pie-1p::GFP::H2B + unc-119(+)] III; ddIs6 [tbg-1::GFP + unc-119(+)] V</i>                                   | Oegema et al., 2001     | expresses GFP::H2B and GFP::γ-tubulin, used for live imaging to inspect cell cycle progression (Fig. 1,3, 5, S1, S3) |
| TG3828 | <i>unc-119(ed3) III; gtIs3828[pie-1p:: gfp::kle-2 + unc-119(+)]; ltIs37 [pie-1p::mCherry::his-58 + unc-119 (+)] IV</i> | Sonneville et al., 2015 | expresses GFP::KLE-2 and mCherry::H2B, used for live imaging and WB to track condensin II (Fig. 4,5, S4)             |
| EKM36  | <i>unc-119(ed3) III;cldIs5 [pie-1p::CAPG-1::GFP + unc-119 (+)]; ltIs37 [pie-1p::mCherry::his-58 + unc-119 (+)] IV</i>  | Bembenek et al., 2013   | expresses GFP::CAPG-1 and mCherry::H2B, used for live imaging and WB to track condensin I (Fig. 4,5, S4)             |
| GCP529 | <i>rod-1(lt62[gfp::rod-1]) IV; ltIs122[pAA64; pie-1p::mCherry::his-58 + cb-unc-119(+)]; unc-119(ed3) III</i>           | Pereira et al., 2018    | expresses GFP::ROD-1 and mCherry::H2B, used for live imaging to assess outer kinetochore behaviour (Fig. 2, S2)      |
| TH229  | <i>ddIs68 [bub-1::TY1::EGFP::3xFLAG(92C12) + unc-119(+)]</i>                                                           | Sarov et al., 2012      | expresses GFP::BUB-1, used for live imaging to assess outer kinetochore behaviour (Fig. 2, S2)                       |
| TH243  | <i>unc-119(ed3) III; ddIs153 [knl-1::TY1::EGFP::3xFLAG(92C12) + Cbr-unc-119(+)]</i>                                    | Sarov et al., 2012      | expresses GFP::KNL-1, used for live imaging to assess outer kinetochore behaviour (Fig. 2, S2)                       |

|        |                                                                                                          |                        |                                                                                                                                                          |
|--------|----------------------------------------------------------------------------------------------------------|------------------------|----------------------------------------------------------------------------------------------------------------------------------------------------------|
| FAS3   | <i>ugeTi1[knl-2p::FLAG::GFP::knl-2 + cb-unc-119(+)] II; unc-119(ed3) III</i>                             | Prosée et al.,<br>2020 | expresses GFP::KNL-2, used for live imaging for checking KNL-2 levels (Fig. 2, S2)                                                                       |
| FAS19  | <i>hcp-3 (uge9[HA::hcp-3]) III</i>                                                                       | Prosée et al.,<br>2020 | expresses HA::CENP-A, used as parental strain for other strain construction                                                                              |
| FAS111 | <i>knl-2(uge70[knl-2::2HA]) I;</i>                                                                       | Prosée et al.,<br>2020 | expresses KNL-2::HA, used for IP-MS (Fig. 1, S1)                                                                                                         |
| FAS127 | <i>knl-2 (uge88[knl-2::Ollas]) I; hcp-3 (uge9[HA::hcp-3]) III</i>                                        | Prosée et al.,<br>2020 | expresses HA::CENP-A and KNL-2::Ollas, used as parental strain for other strain construction and as WT in staining experiments (Fig. 1, 2, 3, 5, S1, S2) |
| FAS131 | <i>hcp-3 (uge85[GFP::HA::hcp-3]) III</i>                                                                 | Prosée et al.,<br>2020 | expresses GFP::CENP-A, used for live imaging for checking CENP-A levels (Fig. 2, S2)                                                                     |
| FAS153 | <i>hcp-4(uge103[mCherry::FLAG::hcp-4]) I; knl-2 (uge88[knl-2::Ollas]) I; hcp-3 (uge9[HA::hcp-3]) III</i> | Prosée et al.,<br>2020 | expresses mCherry::CENP-C, HA::CENP-A and KNL-2::Ollas, used for live imaging for checking CENP-C levels (Fig. 2, S2)                                    |
| FAS157 | <i>knl-2(uge107[knl-2 T750A::Ollas]) I; hcp-3 (uge9[HA::hcp-3]) III</i>                                  | This study             | expresses HA::CENP-A and KNL-2::Ollas with T750A mutation (Fig. 1)                                                                                       |
| FAS217 | <i>knl-2 (uge137[knl-2 S772A::Ollas]) I; hcp-3 (uge9[HA::hcp-3]) III</i>                                 | This study             | expresses HA::CENP-A and KNL-2::Ollas with S772A mutation (Fig. 1)                                                                                       |
| FAS218 | <i>knl-2 (uge138[knl-2 S784A]) I; hcp-3 (uge9[HA::hcp-3]) III</i>                                        | This study             | expresses HA::CENP-A and KNL-2 with S784A mutation (Fig. 1), this strain has additional aa at KNL-2 C                                                    |



|          |                                                                                                                     |            |                                                                                                                                                                               |
|----------|---------------------------------------------------------------------------------------------------------------------|------------|-------------------------------------------------------------------------------------------------------------------------------------------------------------------------------|
|          |                                                                                                                     |            | terminus (DYKDDDKR) from an unsuccessful FLAG-tagging attempt                                                                                                                 |
| FAS219   | <i>knl-2(uge139[knl-2 T750A S772A::Ollas]) I; hcp-3(uge9[HA::hcp-3]) III</i>                                        | This study | expresses HA::CENP-A and KNL-2::Ollas with T750A and S772A mutation (Fig. 1)                                                                                                  |
| FAS156   | <i>knl-2(uge106[knl-2 S772A S784A::Ollas]) I; hcp-3(uge9[HA::hcp-3]) III</i>                                        | This study | expresses HA::CENP-A and KNL-2::Ollas with S772A and S784A mutations, used as parental strain for other strain construction and in staining experiments (Fig. 1, 2, 3, 5, S2) |
| FAS220   | <i>knl-2(uge140[knl-2 T750A S772A S784A::Ollas]) I; hcp-3(uge9[HA::hcp-3]) III</i>                                  | This study | expresses HA::CENP-A and KNL-2::Ollas with S772A, S784A and T750A mutations (Fig. 1, S1)                                                                                      |
| FAS221   | <i>knl-2(uge106[knl-2 S772A S784A::Ollas]) I; hcp-3(uge85[GFP::HA::hcp-3]) III</i>                                  | This study | expresses GFP::CENP-A and KNL-2::Ollas with S772A and S784A mutations, used for live imaging for checking CENP-A levels (Fig. 2, S2)                                          |
| FAS222   | <i>knl-2(uge106[knl-2 S772A S784A::Ollas]) I; hcp-4(uge141[mCherry::FLAG::hcp-4]) I; hcp-3(uge9[HA::hcp-3]) III</i> | This study | expresses mCherry::CENP-C, HA::CENP-A and KNL-2::Ollas with S772A and S784A mutations, used for live imaging for checking CENP-C levels (Fig. 2, S2)                          |
| FAS223 # | <i>knl-2(uge106[knl-2 S772A S784A::Ollas]) I; ugeTi142[knl-2p::FLAG::GFP::knl-2 S772A S784A + cb-unc-119(+)] II</i> | This study | expresses GFP::KNL-2 with S772A and S784A mutations, used for live imaging for checking KNL-2 levels (Fig. 2, S2)                                                             |

|             |                                                                                                                                                |            |                                                                                                                                                                            |
|-------------|------------------------------------------------------------------------------------------------------------------------------------------------|------------|----------------------------------------------------------------------------------------------------------------------------------------------------------------------------|
| FAS224<br># | <i>knl-2(uge106[knl-2 S772A S784A::Ollas]) I; ruls32 [pie-1p::GFP::H2B + unc-119(+)] III; ddis6 [tbg-1::GFP + unc-119(+)] V</i>                | This study | expresses GFP::H2B, GFP:: $\gamma$ -tubulin and KNL-2::Ollas with S772A and S784A mutations, used for live imaging to inspect cell cycle progression (Fig. 1,3, 5, S1, S3) |
| FAS225<br># | <i>knl-2(uge106[knl-2 S772A S784A::Ollas]) I; gtl33828[pie-1p::gfp::kle-2 + unc-119(+)]; ltl337 [pie-1p::mCherry::his-58 + unc-119 (+)] IV</i> | This study | expresses GFP::KLE-2, mCherry::H2B and KNL-2::Ollas with S772A and S784A mutations, used for live imaging and WB to track condensin II (Fig. 4,5, S4)                      |
| FAS226<br># | <i>knl-2(uge106[knl-2 S772A S784A::Ollas]) I; cdis5 [pie-1p::CAPG-1::GFP + unc-119 (+)]; ltl337 [pie-1p::mCherry::his-58 + unc-119 (+)] IV</i> | This study | expresses GFP::CAPG-1, mCherry::H2B and KNL-2::Ollas with S772A and S784A mutations, used for live imaging and WB to track condensin I (Fig. 4, 5, S4)                     |
| FAS230      | <i>knl-2(uge106[knl-2 S772A S784A::Ollas]) I; rod-1(lt62[gfp::rod-1]) IV</i>                                                                   | This study | expresses GFP::ROD-1 and KNL-2::Ollas with S772A and S784A mutations, used for live imaging to assess outer kinetochore behaviour (Fig. 2, S2)                             |
| FAS231<br># | <i>knl-2(uge106[knl-2 S772A S784A::Ollas]) I; ddis68 [bub-1::TY1::EGFP::3xFLAG(92C12) + unc-119(+)]</i>                                        | This study | expresses GFP::BUB-1, and KNL-2::Ollas with S772A and S784A mutations used for live imaging to assess outer kinetochore behaviour (Fig. 2, S2)                             |
| FAS232<br># | <i>knl-2(uge106[knl-2 S772A S784A::Ollas]) I; ddis153 [knl-1::TY1::EGFP::3xFLAG(92C12) + Cbr-unc-119(+)]</i>                                   | This study | expresses GFP::KNL-1, and KNL-2::Ollas with S772A and S784A mutations used for live imaging to assess outer kinetochore behaviour (Fig. 2, S2)                             |

997 # These strains may harbour the *119(ed3) III* mutation in homo- or heterozygous state, as they were  
998 obtained by genetic crossing and one of the parents was a *unc-119(ed3) III* homozygote.

999 **Table S3. List of sgRNAs and repair templates used in this study**

| oligo/<br>plasmid<br>name | sequence                                                                                                                                                                | Description/Purpose                                                                                                              |
|---------------------------|-------------------------------------------------------------------------------------------------------------------------------------------------------------------------|----------------------------------------------------------------------------------------------------------------------------------|
| pFSa105                   | TCAATAATTGGGGTGCAT                                                                                                                                                      | sgRNA sequence for CENP-A (HCP-3) N-terminal tagging                                                                             |
| pFSa106                   | GCGATTCCTCAATAATTG                                                                                                                                                      | sgRNA sequence for CENP-A (HCP-3) N-terminal tagging                                                                             |
| oFSa0069                  | GTTTTCTAAATTTATATTTTAT<br>CAGGATAATCTTCGAACAATG<br>TACCCATACGATGTTCTGACT<br>ATGCTGCAGCCTACCCATACG<br>ATGTTCTGACTATGCTGCAG<br>ATGACACACCAATTATTGAGG<br>AAATCGCCGAGCAAATG | Repair template for CENP-A (HCP-3) N-terminal double HA tagging (contains PstI restriction site for screening)                   |
| pJW6                      | ATGCACAGAGATTAGTAGA                                                                                                                                                     | sgRNA sequence for KNL-2 C-terminal tagging; used also for modification of serines S772 and S784 (together with pJW29 and pJW30) |
| oJW0208                   | AGTAGAATAATTCCATGCACA<br>GAGATTACTTTCCATGAGAC<br>GTGGTCCGAGCTCGTTGGCGA<br>ATCCGGAGGATCCTCCCATGT<br>AGATAGATGTGTCTTCTCAC<br>GC                                           | Repair template for KNL-2 C-terminal Ollas tagging (contains BamHI restriction site for screening)                               |
| pJW1                      | ACAATCGTACTGCGGGTTCG                                                                                                                                                    | sgRNA sequence for CENP-C (HCP-4) N-terminal tagging                                                                             |
| pJW2                      | GCAGTACGATTGTTCTGG                                                                                                                                                      | sgRNA sequence for CENP-C (HCP-4) N-terminal tagging                                                                             |
| pJW53                     | ATAGTTACAAAGAAGAGAG                                                                                                                                                     | sgRNA sequence for introducing KNL-2 T750A                                                                                       |

|         |                                                                                    |                                                                                                                                                                                                                         |
|---------|------------------------------------------------------------------------------------|-------------------------------------------------------------------------------------------------------------------------------------------------------------------------------------------------------------------------|
|         |                                                                                    | mutation                                                                                                                                                                                                                |
| oJW0353 | TGGCTGCTGATCAATCATTGC<br>TCGCTCTCAGAgCtCCAATtGTc<br>ACtAAGAAGAGAGGAGGAAC<br>AAGAGC | Repair template for introducing KNL-2 T750A mutation (contains <i>ScaI</i> restriction site for screening)                                                                                                              |
| pJW29   | GTTTTACGCCTCTTGCAA                                                                 | sgRNA sequence for KNL-2 S772 and S784 modification                                                                                                                                                                     |
| pJW30   | ACAGAAGTTTTACGCCTCT                                                                | sgRNA sequence for KNL-2 S772 and S784 modification                                                                                                                                                                     |
| pJW56   |                                                                                    | backbone: pCR-BluntII-TOPO (Invitrogen); contains: <i>knl-2</i> (2312-3024) with S772A and S784A mutations, <i>AgeI</i> and <i>XhoI</i> restriction sites for screening, and C-terminal Ollas tag                       |
| pJW55   |                                                                                    | repair template for FAS223 construction; backbone: pCFJ151; contains: <i>knl-2p</i> (2 kb upstream of ATG); 3xFLAG, GFP, <i>knl-2</i> cds with S772A and S784A mutations, <i>knl-2</i> 3'UTR (500 bp downstream of TAA) |

1000

1001 **MOVIES**

1002 **Movie 1. First embryonic cell division in WT and the S772A/S784A strain expressing GFP::H2B and**  
1003 **GFP:: $\gamma$ -tubulin at 20°C. Scale bar: 10  $\mu$ m.**

1004 **Movie 2. First embryonic cell division in WT and the S772A/S784A strain expressing GFP::H2B and**  
1005 **GFP:: $\gamma$ -tubulin at 25°C. Scale bar: 10  $\mu$ m.**

1006 **Movie 3. First embryonic cell division in a strain expressing GFP::H2B and GFP:: $\gamma$ -tubulin at 25°C**  
1007 **after partial *hcp-6* mRNA depletion. Scale bar: 10  $\mu$ m.**

1008 **Movie 4. First embryonic cell division in WT and the S772A/S784A strain expressing GFP::KLE-2 and**  
1009 **mCherry::H2B at 25°C. Scale bar: 10  $\mu$ m.**

1010 **Movie 5. First embryonic cell division in WT and the S772A/S784A strain expressing GFP::CAPG-1**  
1011 **and mCherry::H2B at 25°C. Scale bar: 10  $\mu$ m.**
